# Supplementary material for: Innovation of heterochromatin functions drives rapid evolution of essential ZAD-ZNF genes in Drosophila
Source: eLife. 2020 Nov 10;9:e63368. doi: 10.7554/eLife.63368 (PMC7655104; doi:10.7554/eLife.63368)
Supplement: Supplementary file 1. — ZAD-ZNF gene repertoires in different Drosophila species were inferred from OrthoDB analyses (Materials and methods). Phenotypic consequences of knockdown or knockout phenotype of ZAD-ZNFs in D. melanogaster were retrieved from flybase.org. Key for citations: Neely et al. Cell 2010 (Neely et al., 2010) Mummery-Widmer et al. Nature 2009 (Mummery-Widmer et al., 2009) Schnorrer et al. Nature 2010 (Schnorrer et al., 2010) Chang et al. Dev. Cell 2010 (Chang et al., 2010) Burguete et al. Dev. Biol. 2019 (Burguete et al., 2019) Gibert et al. Dev. Biol. 2005 (Gibert et al., 2005) Dai et al. Dev. Cell 2003 (Dai et al., 2003) Komura-Kawa et al. PLOS Genet. 2015 (Komura-Kawa et al., 2015) Weiler Genetics 2007 (Weiler, 2007) Giulian et al. PLOS ONE 2013 (Giuliani et al., 2013) Chen et al. Science 2010 (Chen et al., 2010) Schalet Mutat. Res. 1986 (Schalet, 1986) Shannon et al. Genetics 1972 (Shannon et al., 1972) Judd et al. Genetics 1972 (Judd et al., 1972) Liu et al. Genetics 1975 (Liu and Lim, 1975) Lim et al. Genet. Res. 1974 (Lim and Snyder, 1974) Robbins Genetics 1983 (Robbins, 1983) Gaszner et al. Genes Dev. 1999 (Gaszner et al., 1999) Schertel et al. Genome Res. 2015 (Schertel et al., 2015) Toba et al. Genetics 1999 (Toba et al., 1999) Ruppert et al. Cell Rep. 2017 (Ruppert et al., 2017) Schupbach et al. Genetics 1989 (Schüpbach and Wieschaus, 1989) Chen et al. Development 2000 (Chen et al., 2000) Lieberfarb et al. Development 1996 (Lieberfarb et al., 1996) Page et al. J. Cell Sci. 1996 (Page and Orr-Weaver, 1996) Whitfield et al. PLOS Biol. 2013 (Whitfield et al., 2013) Holden et al. Genetics 1973 (Holden and Suzuki, 1973) Ishimoto et al. Genetics 2010 (Ishimoto and Kitamoto, 2010) Ishimoto et al. Proc. Natl. Acad. Sci. USA 2009 (Ishimoto et al., 2009) Walker et al. J. Insect Physiol. 1987 (Walker et al., 1987) Ono et al. Dev. Biol. 2006 (Ono et al., 2006) Neubueser et al. Dev. Biol. 2005 (Neubueser et al., 2005) Laundrie et al. Genetics 2003 (Laundrie et al., 2003) Spr [file elife-63368-supp1.xlsx]

## Sheet: total
Gene name	Phenotype	Knockdown Alleles	Knockout Alleles	Speices with orthologs	Citation
CG10147	viable	VDRC GD		mel, sim, sec, ere, yak, ana, pse, per, wil, vir, moj, gri	Neely et al. Cell 2010
CG10267	lethal	VDRC GD/KK	EMS	mel, sim, sec, ere, yak, ana, pse, per, wil, vir, moj, gri	Mummery-Widmer et al. Nature 2009
					Schnorrer et al. Nature 2010
					Chang et al. Dev. Cell 2010
					Burguete et al. Dev. Biol. 2019
CG10269	viable	VDRC GD		mel, sim, sec, yak, ana, pse, per, wil, vir, moj, gri	Neely et al. Cell 2010
CG10270	viable	VDRC GD		mel, sim, sec, yak, ana, pse, wil	Neely et al. Cell 2010
CG10274	viable	VDRC GD		mel, sim, sec, ere, yak, ana, pse, per, wil, vir, moj, gri	Neely et al. Cell 2010
CG10309	lethal		Delta2-3 transposase	mel, sim, sec, ere, yak, ana, pse, per, wil, vir, moj, gri	Gibert et al. Dev. Biol. 2005
CG10321	viable	VDRC GD		mel, sim, sec, ere, yak, ana, pse, per, wil, vir, moj, gri	Neely et al. Cell 2010
CG10366	viable	VDRC GD		mel, sim, sec, ere, yak, ana, pse, per, wil, vir, moj, gri	Neely et al. Cell 2010
CG10431	viable	VDRC GD		mel, sim, sec, ere, yak, ana, pse, per, wil, vir, moj, gri	Neely et al. Cell 2010
					Mummery-Widmer et al. Nature 2009
					Schnorrer et al. Nature 2010
CG10654	viable	VDRC GD		mel, sim, sec, ere, yak, ana, pse, per, wil, vir, moj, gri	Neely et al. Cell 2010
CG10669	viable	VDRC GD	P-element	mel, sim, sec, ere, yak, ana, pse, per, wil, vir, moj, gri	Neely et al. Cell 2010
					Gene Disruption Project (personal communication to flybase)
CG11371	lethal		P-element	mel, sim, sec, ere, yak, ana, pse, per, wil, vir, moj, gri	Dai et al. Dev. Cell 2003
CG11695	viable		piggybac	mel, sim, sec, ere, yak, ana, pse, per, wil, vir, moj, gri	BDSC (personal communication to flybase)
CG11696	-	-	-	mel, sim, sec, ere, yak, ana, pse, per, wil, vir, moj, gri
CG11762	lethal		CRISPR/Cas mediated frameshift mutations	mel, sim, sec, ere, yak, ana, pse, per, wil, vir, moj, gri	Komura-Kawa et al. PLoS Genet. 2015
CG11902	viable	VDRC GD		mel, sim, sec, ere, yak, ana, pse, per, wil, vir, moj, gri	Neely et al. Cell 2010
					Mummery-Widmer et al. Nature 2009
					Schnorrer et al. Nature 2010
CG11971	lethal		complex substitution leading to frameshift mutation	mel, sim, sec, ere, yak, ana, pse, per, wil, vir, moj, gri	Weiler Genetics 2007
CG12219	viable	VDRC GD		mel, sim, sec, ere, yak, ana, pse, per, wil, vir, moj, gri	Neely et al. Cell 2010
					Mummery-Widmer et al. Nature 2009
					Schnorrer et al. Nature 2010
CG12391	viable	VDRC GD		mel, sim, sec, ere, yak, ana, pse, per, wil, vir, moj, gri	Neely et al. Cell 2010
					Mummery-Widmer et al. Nature 2009
					Schnorrer et al. Nature 2010
					BDSC (personal communication to flybase)
CG12942	viable	VDRC GD		mel, sim, sec, ere, yak, ana, pse, per, wil, vir, moj, gri	Neely et al. Cell 2010
CG13123	viable	VDRC GD		mel, sim, sec, ere, yak, ana, pse, per, wil, vir, moj, gri	Mummery-Widmer et al. Nature 2009
					Schnorrer et al. Nature 2010
CG14441	viable		P-element	mel, sim, sec, ere, yak, ana, pse, per, wil, vir, moj, gri	BDSC (personal communication to flybase)
CG14667	viable	VDRC GD		mel, sim, sec, ere, yak, ana, pse, per, wil, vir, moj, gri	Neely et al. Cell 2010
CG14710	viable	VDRC GD	piggybac	mel, sim, sec, ere, yak, ana, pse, per, wil, vir, moj, gri	BDSC (personal communication to flybase)
CG14711	-	-	-	mel, sim, sec, ere, yak, ana, pse, per, wil, vir, moj, gri
CG15073	viable	VDRC GD		mel, sim, sec, ere, yak, ana, pse, per, wil, vir, moj, gri	Neely et al. Cell 2010
					Mummery-Widmer et al. Nature 2009
					Schnorrer et al. Nature 2010
CG1529	viable	VDRC GD		mel, sim, sec, ere, yak, ana, pse, per, wil, vir, moj, gri	Neely et al. Cell 2010
					Mummery-Widmer et al. Nature 2009
					Schnorrer et al. Nature 2010
CG15367	viable	VDRC GD		mel, sim, sec, ere, yak, ana, pse, wil, vir, moj, gri	Neely et al. Cell 2010
					Mummery-Widmer et al. Nature 2009
					Schnorrer et al. Nature 2010
CG15435	viable	VDRC GD		mel, sim, sec, ere, yak, ana, pse, per, wil, vir, moj, gri	Neely et al. Cell 2010
					Mummery-Widmer et al. Nature 2009
					Schnorrer et al. Nature 2010
CG15436	viable	VDRC GD	piggybac	mel, sim, sec, ere, yak, ana, pse, per, vir, moj, gri	Neely et al. Cell 2010
					Mummery-Widmer et al. Nature 2009
					Schnorrer et al. Nature 2010
					BDSC (personal communication to flybase)
CG1647	viable	VDRC GD	P-element	mel, sim, sec, ere, yak, ana, pse, per, wil, vir, moj, gri	Giuliani et al. PLOS ONE 2013
					Neely et al. Cell 2010
CG17328	viable	VDRC GD		mel, sim, sec, ere, yak, ana, pse, per, wil, vir, moj, gri	Neely et al. Cell 2010
CG17359	lethal	VDRC GD		mel, sim, sec, ere, yak, ana	Neely et al. Cell 2010
CG17361	viable	VDRC GD	piggybac	mel, sim, sec, ere, yak, ana, pse, per	Neely et al. Cell 2010
					Schnorrer et al. Nature 2010
					BDSC (personal communication to flybase)
CG17568	viable	VDRC GD	piggybac	mel, sim, sec, ere, yak, ana, pse, per, wil, vir, moj, gri	Mummery-Widmer et al. Nature 2009
					Schnorrer et al. Nature 2010
					BDSC (personal communication to flybase)
CG17612	viable	VDRC GD	piggybac	mel, sim, sec, ere	Neely et al. Cell 2010
					BDSC (personal communication to flybase)
CG17801	viable	VDRC GD	P-element	mel, sim, sec, ere, yak, ana	Neely et al. Cell 2010
					Gene Disruption Project (personal communication to flybase)
					This study
CG17802	lethal	VDRC KK		mel, sim, sec, ere, yak, pse, per	Mummery-Widmer et al. Nature 2009
					Chen et al. Science 2010
					this study
CG17803	viable	VDRC GD		mel, sim, sec, ere, yak, ana	Neely et al. Cell 2010
					Mummery-Widmer et al. Nature 2009
					Schnorrer et al. Nature 2010
					this study
CG17806	viable	VDRC GD	P-element	mel, sim, sec, ere, yak, ana, pse, per, vir	Schnorrer et al. Nature 2010
					Gene Disruption Project (personal communication to flybase)
					this study
CG1792	viable	VDRC GD	piggybac	mel, sim, sec, ere, yak, ana, pse, per, wil, vir, moj, gri	Neely et al. Cell 2010
					Schnorrer et al. Nature 2010
					BDSC (personal communication to flybase)
CG18476	viable	VDRC GD		mel, sim, sec, ere, yak, ana, pse, per, wil, vir, moj, gri	Neely et al. Cell 2010
					Mummery-Widmer et al. Nature 2009
					Schnorrer et al. Nature 2010
CG18764	viable	VDRC GD		mel, sim, sec, ere, yak, ana, pse, per, wil, vir, moj, gri	Neely et al. Cell 2010
					Mummery-Widmer et al. Nature 2009
					Schnorrer et al. Nature 2010
CG2202	viable	VDRC GD		mel, sec, ere, yak, ana, pse, per, wil, vir, moj, gri	Neely et al. Cell 2010
					Mummery-Widmer et al. Nature 2009
					Schnorrer et al. Nature 2010
CG2678	viable	VDRC GD		mel, sim, sec, ere, yak, pse, per	Mummery-Widmer et al. Nature 2009
					Schnorrer et al. Nature 2010
CG2711	lethal		X-ray, EMS, MMS	mel, sim, sec, ere, yak, ana, pse, per, wil, vir, moj, gri	Schalet Mutat. Res. 1986
					Shannon et al. Genetics 1972
					Judd et al. Genetics 1972
					Liu et al. Genetics 1975
					Lim et al. Genet. Res. 1974
					Robbins Genetics 1983
					Gaszner et al. Genes Dev.1999.
CG2712	viable	VDRC GD	piggbac	mel, sim, sec, ere, yak, ana, pse, per, vir, moj, gri	Neely et al. Cell 2010
					Mummery-Widmer et al. Nature 2009
					Schnorrer et al. Nature 2010
					BDSC (personal communication to flybase)
CG2889	viable	VDRC GD	P-element	mel, sim, sec, ere, yak, ana, pse, per, wil, vir, moj, gri	Neely et al. Cell 2010
					Mummery-Widmer et al. Nature 2009
					Schnorrer et al. Nature 2010
					Gene Disruption Project (personal communication to flybase)
CG30020	viable	VDRC GD	piggybac	mel, sim, sec, ere, yak, ana, pse, per, wil, vir, moj, gri	Schertel et al. Genome Res. 2015
					BDSC (personal communication to flybase)
CG3032	-	-	-	mel, sim, sec, ere, yak, ana, pse, per, wil, vir, moj, gri
CG30431	viable	VDRC GD		mel, sim, sec, ere, yak, ana, pse, per, wil, vir, moj, gri	Neely et al. Cell 2010
CG31109	viable	VDRC GD	piggybac	mel, sim, sec, ere, yak, ana, pse, per, wil, vir, moj, gri	Neely et al. Cell 2010
					Mummery-Widmer et al. Nature 2009
					Schnorrer et al. Nature 2010
					BDSC (personal communication to flybase)
CG31365	viable	VDRC GD		mel, sim, sec, ere, yak, ana, pse, per, wil, vir, moj, gri	Neely et al. Cell 2010
					Mummery-Widmer et al. Nature 2009
					Schnorrer et al. Nature 2010
CG31388	viable	VDRC GD	piggybac	mel, sim, sec, ere, yak, ana, vir, moj, gri	Mummery-Widmer et al. Nature 2009
					Schnorrer et al. Nature 2010
					BDSC (personal communication to flybase)
CG31441	lethal	VDRC GD		mel, sim, sec, ere, yak, ana, vir, moj, gri	Mummery-Widmer et al. Nature 2009
CG31457	viable	VDRC GD		mel, sim, sec, ere, yak, ana, pse, per, wil, vir, moj, gri	Neely et al. Cell 2010
					Mummery-Widmer et al. Nature 2009
					Schnorrer et al. Nature 2010
CG32575	lethal			mel, sim, sec, ere, yak, ana, pse, per, wil, vir, moj, gri	Toba et al. Genetics 1999
					Ruppert et al Cell Rep. 2017
					Mummery-Widmer et al. Nature 2009
CG3281	viable	VDRC GD		mel, sim, sec, ere, yak, ana, pse, per, vir, moj, gri	Neely et al. Cell 2010
					Mummery-Widmer et al. Nature 2009
					Schnorrer et al. Nature 2010
CG33133	lethal		EMS	mel, sim, sec, ere, yak, ana, pse, per, wil, vir, moj, gri	Schupbach et al. Genetics 1989
					Chen et al. Development 2000
					Lieberfarb et al. Development 1996
					Page et al. J. Cell Sci. 1996
					Whitfield et al. PLoS Biol. 2013
CG34100	lethal		EMS	mel, sim, sec, ere, yak, ana, pse, per, wil, vir, moj, gri	Holden et al. Genetics 1973
					Ishimoto et al. Genetics 2010
					Ishimoto et al. Proc. Natl. Acad. Sci. USA 2009
					Walker et al. J. Insect Physiol. 1987
					Ono et al. Dev. Biol. 2006
					Neubueser et al. Dev. Biol. 2005
					Mummery-Widmer et al. Nature 2009
CG3941	lethal	GG	EMS, P-element	mel, sim, sec, ere, yak, ana, pse, per, wil, vir, moj, gri	Laundrie et al. Genetics 2003
					Spradling et al. Genetics 1999
					Page et al. EMBO J. 2005
					Mummery-Widmer et al. Nature 2009
					BDSC (personal communication to flybase)
CG4148	lethal		EMS	mel, sim, sec, ere, yak, ana, pse, per, wil, vir, moj, gri	Luschnig et al. Genetics 2004
					Ashburner et al. Genetics 1990
					Chen et al. Curr. Biol. 2006
					Kahsai et al. G3 2018
CG4282	viable	VDRC GD		mel, sim, sec, ere, yak, ana, pse, per, wil, vir, moj, gri	Mummery-Widmer et al. Nature 2009
					Schnorrer et al. Nature 2010
CG4318	viable	VDRC GD		mel, sim, sec, ere	Neely et al. Cell 2010
					Mummery-Widmer et al. Nature 2009
					Schnorrer et al. Nature 2010
CG44002	viable	VDRC GD		mel, sim, sec, ere, yak, ana	Mummery-Widmer et al. Nature 2009
					Schnorrer et al. Nature 2010
CG4413	sterile		EMS	mel, sim, sec, ere, yak, ana	Lake et al. PLoS Genet. 2011
CG4424	viable	VDRC GD		mel, sim, sec, ere, yak, ana, pse, per, wil, vir, moj, gri	Neely et al. Cell 2010
					Mummery-Widmer et al. Nature 2009
					Schnorrer et al. Nature 2010
CG4730	viable	VDRC GD	piggybac	mel, sim, sec, ere, yak, ana, vir, moj	Neely et al. Cell 2010
					Mummery-Widmer et al. Nature 2009
					Schnorrer et al. Nature 2010
					BDSC (personal communication to flybase)
CG4820	viable	VDRC GD		mel, sim, sec, ere, yak, ana, pse, per, wil, vir, moj, gri	Neely et al. Cell 2010
					Mummery-Widmer et al. Nature 2009
					Schnorrer et al. Nature 2010
CG4854	viable	VDRC GD	piggybac	mel, sim, sec, ere, yak, ana, pse, per, wil, vir, moj, gri	Neely et al. Cell 2010
					Mummery-Widmer et al. Nature 2009
					Schnorrer et al. Nature 2010
					BDSC (personal communication to flybase)
CG4936	lethal	VDRC GD	P-element	mel, sim, sec, ere, yak, ana, pse, per, wil, vir, moj, gri	Mummery-Widmer et al. Nature 2009
					Schnorrer et al. Nature 2010
					Zhang et al. Genetics 2007
CG5034	-	-	-	mel, sim, sec, ere, yak, ana, pse, per, wil, vir, moj, gri
CG6254	viable	VDRC GD		mel, sim, sec, ere, yak, ana, pse, per, wil, vir, moj, gri	Neely et al. Cell 2010
					Mummery-Widmer et al. Nature 2009
					Schnorrer et al. Nature 2010
CG6654	-	-	-	mel, sim, sec, ere, yak, ana, pse, per, wil, vir, moj, gri
CG6689	lethal	VDRC GD		mel, sim, sec, ere, yak, ana, pse, per, wil, vir, moj, gri	Mummery-Widmer et al. Nature 2009
CG6808	viable	VDRC GD	crispR/Cas deletion	mel, sim, sec, ere, yak, ana, pse, per, wil, vir, moj, gri	Maksimenko et al. Biochim Biophys Acta 2020
					Neely et al. Cell 2010
					Mummery-Widmer et al. Nature 2009
					Schnorrer et al. Nature 2010
					Zolotarev et al. BioTechniques 2019
CG6813	viable		piggybac	mel, sim, sec, ere, yak, ana, pse, per	BDSC (personal communication to flybase)
CG7204	viable	VDRC GD		mel, sim, sec, ere, yak	Neely et al. Cell 2010
					Mummery-Widmer et al. Nature 2009
					Schnorrer et al. Nature 2010
CG7357	lethal	VDRC KK		mel, sim, sec, ere, yak, ana, pse, per, wil, vir, gri	Schertel et al. Genome Res. 2015
					This study
CG7386	lethal	VDRC GD		mel, sim, sec, ere, yak, ana, pse, wil, vir, moj, gri	Neely et al. Cell 2010
					Mummery-Widmer et al. Nature 2009
					Schnorrer et al. Nature 2010
					Neumüller et al. Cell Stem Cell 2011
CG7963	lethal	VDRC GD		mel, sim, sec, ere, yak, pse, per, wil, vir, moj, gri	Neely et al. Cell 2010
CG8145	viable	VDRC GD		mel, sim, sec, ere, yak, pse, per, wil	Neely et al. Cell 2010
					Mummery-Widmer et al. Nature 2009
					Schnorrer et al. Nature 2010
CG8159	viable	VDRC GD		mel, sim, sec, ere, yak, ana, pse, per, wil, vir, moj, gri	Mummery-Widmer et al. Nature 2009
CG8301	viable	VDRC GD	piggybac insertion	mel, sim, sec, ere, yak, ana, pse, per, wil, vir, moj, gri	Neely et al. Cell 2010
					BDSC (personal communication to flybase)
CG8319	viable	VDRC GD		mel, sim, sec, ere, yak, ana, pse, per	Neely et al. Cell 2010
					Mummery-Widmer et al. Nature 2009
					Schnorrer et al. Nature 2010
CG8388	viable	VDRC GD		mel, sim, sec, ere, yak, ana, pse, per, wil, vir, moj, gri	Neely et al. Cell 2010
					Mummery-Widmer et al. Nature 2009
					Schnorrer et al. Nature 2010
CG8474	-	-	-	mel, sim, sec, ere, yak, ana, pse, per, wil, vir
CG9215	viable	VDRC GD		mel, sim, sec, ere, yak, ana, pse, per, wil, vir, moj, gri	Neely et al. Cell 2010
					Mummery-Widmer et al. Nature 2009
					Schnorrer et al. Nature 2010
CG9233	lethal	VDRC GD	p element	mel, sim, sec, ere, yak, ana, pse, per, wil, vir, moj, gri	Nazario-Yepiz et al. Mech. Dev. 2017
CG9793	sterile		piggybac	mel, sim, sec, ere, yak, vir, moj, gri	Lewandowski et al. Dev. Biol. 2010
CG9797	viable	TRiP		mel, sim, sec, ere, yak, ana, pse, per, wil, vir, moj, gri	Ellis et al. PLOS ONE 2015
