# Supplementary material for: Innovation of heterochromatin functions drives rapid evolution of essential ZAD-ZNF genes in Drosophila
Source: eLife. 2020 Nov 10;9:e63368. doi: 10.7554/eLife.63368 (PMC7655104; doi:10.7554/eLife.63368)
Supplement: Supplementary file 3. [file elife-63368-supp3.xlsx]

## Sheet: enrichmentAnalysis_GO_KEGG_REAC
Gene list	Number of genes tested	Analysis type	Functional category description	Category ID	P-value	Fold enrichment	Number of affected genes	Number of genes in category	Number of genes expected by chance	Percent of category	Percent of genes tested	Gene names	Gene descriptions
Over-expressed 24 AEL	116	Biological process	desensitization of G protein-coupled receptor signaling pathway by arrestin	GO:0002032	8e-05	Inf	2	2	0.02	1	0.017	Arr1,Arr2	Arrestin 1,Arrestin 2
Over-expressed 24 AEL	116	Biological process	negative adaptation of signaling pathway	GO:0022401	8e-05	Inf	2	2	0.02	1	0.017	Arr1,Arr2	Arrestin 1,Arrestin 2
Over-expressed 24 AEL	116	Biological process	negative regulation of G protein-coupled receptor signaling pathway	GO:0045744	8e-05	Inf	2	2	0.02	1	0.017	Arr1,Arr2	Arrestin 1,Arrestin 2
Over-expressed 24 AEL	116	Biological process	cellular response to light stimulus	GO:0071482	0.0002	16.01	4	33	0.3	0.121	0.034	Arr1,Arr2,Rh5,Rh6	Arrestin 1,Arrestin 2,Rhodopsin 5,Rhodopsin 6
Over-expressed 24 AEL	116	Biological process	cellular response to abiotic stimulus	GO:0071214	0.00021	10.48	5	61	0.55	0.082	0.043	Arr1,Arr2,Ku80,Rh5,Rh6	Arrestin 1,Arrestin 2,Ku80,Rhodopsin 5,Rhodopsin 6
Over-expressed 24 AEL	116	Biological process	homeostatic process	GO:0042592	0.00034	3.66	12	421	3.78	0.029	0.103	Arr1,Arr2,ATPCL,CG12896,CG6908,Gba1a,Ku80,mag,mre11,NLaz,ver,Vha100-4	Arrestin 1,Arrestin 2,ATP citrate lyase,Glucocerebrosidase 1a,Ku80,magro,meiotic recombination 11,Neural Lazarillo,uncharacterized protein,Vacuolar H[+] ATPase 100kD subunit 4,verrocchio
Over-expressed 24 AEL	116	Biological process	visual perception	GO:0007601	0.00043	24.58	3	17	0.15	0.176	0.026	Crys,Rh5,Rh6	Crystallin,Rhodopsin 5,Rhodopsin 6
Over-expressed 24 AEL	116	Biological process	phototransduction	GO:0007602	0.00074	11.04	4	46	0.41	0.087	0.034	Arr1,Arr2,Rh5,Rh6	Arrestin 1,Arrestin 2,Rhodopsin 5,Rhodopsin 6
Over-expressed 24 AEL	116	Biological process	metarhodopsin inactivation	GO:0016060	0.00078	75.53	2	5	0.04	0.4	0.017	Arr1,Arr2	Arrestin 1,Arrestin 2
Over-expressed 24 AEL	116	Molecular function	opsin binding	GO:0002046	8.9e-05	Inf	2	2	0.02	1	0.017	Arr1,Arr2	Arrestin 1,Arrestin 2
Over-expressed 24 AEL	116	Molecular function	G protein-coupled photoreceptor activity	GO:0008020	0.00027	214.21	2	3	0.03	0.667	0.017	Rh5,Rh6	Rhodopsin 5,Rhodopsin 6
Over-expressed 24 AEL	116	Cellular component	rhabdomere	GO:0016028	6.6e-05	21.93	4	30	0.22	0.133	0.034	Arr1,Arr2,Rh5,Rh6	Arrestin 1,Arrestin 2,Rhodopsin 5,Rhodopsin 6
Under-expressed 24 AEL	133	Biological process	hemolymph coagulation	GO:0042381	2.3e-06	68.92	4	9	0.11	0.444	0.03	Hml,Npc2g,Npc2h,PPO1	Hemolectin,Niemann-Pick type C-2g,Niemann-Pick type C-2h,Prophenoloxidase 1
Under-expressed 24 AEL	133	Biological process	regulation of body fluid levels	GO:0050878	8e-05	21.51	4	20	0.24	0.2	0.03	Hml,Npc2g,Npc2h,PPO1	Hemolectin,Niemann-Pick type C-2g,Niemann-Pick type C-2h,Prophenoloxidase 1
Under-expressed 24 AEL	133	Biological process	intracellular cholesterol transport	GO:0032367	0.00013	42.63	3	9	0.11	0.333	0.023	Npc2d,Npc2g,Npc2h	Niemann-Pick type C-2d,Niemann-Pick type C-2g,Niemann-Pick type C-2h
Under-expressed 24 AEL	133	Biological process	intracellular lipid transport	GO:0032365	0.00025	31.97	3	11	0.13	0.273	0.023	Npc2d,Npc2g,Npc2h	Niemann-Pick type C-2d,Niemann-Pick type C-2g,Niemann-Pick type C-2h
Under-expressed 24 AEL	133	Biological process	peptidyl-proline hydroxylation to 4-hydroxy-L-proline	GO:0018401	0.00034	28.41	3	12	0.14	0.25	0.023	CG31371,CG9698,PH4alphaMP	prolyl-4-hydroxylase-alpha MP,uncharacterized protein
Under-expressed 24 AEL	133	Biological process	proteolysis	GO:0006508	0.0004	2.68	19	684	8.16	0.028	0.143	CG11842,CG12951,CG16710,CG18477,CG31780,CG34437,CG4017,CG4408,CG4914,Jon65Ai,Jon65Aii,Jon66Ci,Jon66Cii,Jon74E,klhl10,RnrS,SPH93,thetaTry,Uch	Jonah 65Ai,Jonah 65Aii,Jonah 66Ci,Jonah 66Cii,Jonah 74E,kelch like family member 10,Ribonucleoside diphosphate reductase small subunit,Serine protease homolog 93,thetaTrypsin,Ubiquitin carboxy-terminal hydrolase,uncharacterized protein
Under-expressed 24 AEL	133	Biological process	protein hydroxylation	GO:0018126	0.00083	19.66	3	16	0.19	0.188	0.023	CG31371,CG9698,PH4alphaMP	prolyl-4-hydroxylase-alpha MP,uncharacterized protein
Under-expressed 24 AEL	133	Molecular function	serine-type endopeptidase activity	GO:0004252	9.2e-09	9.63	13	146	1.67	0.089	0.098	CG11842,CG12951,CG16710,CG31780,CG34437,CG4914,Jon65Ai,Jon65Aii,Jon66Ci,Jon66Cii,Jon74E,SPH93,thetaTry	Jonah 65Ai,Jonah 65Aii,Jonah 66Ci,Jonah 66Cii,Jonah 74E,Serine protease homolog 93,thetaTrypsin,uncharacterized protein
Under-expressed 24 AEL	133	Molecular function	serine hydrolase activity	GO:0017171	4.7e-08	8.3	13	167	1.91	0.078	0.098	CG11842,CG12951,CG16710,CG31780,CG34437,CG4914,Jon65Ai,Jon65Aii,Jon66Ci,Jon66Cii,Jon74E,SPH93,thetaTry	Jonah 65Ai,Jonah 65Aii,Jonah 66Ci,Jonah 66Cii,Jonah 74E,Serine protease homolog 93,thetaTrypsin,uncharacterized protein
Under-expressed 24 AEL	133	Molecular function	peptidase activity, acting on L-amino acid peptides	GO:0070011	7.6e-06	4.25	16	390	4.47	0.041	0.12	CG11842,CG12951,CG16710,CG31780,CG34437,CG4017,CG4408,CG4914,Jon65Ai,Jon65Aii,Jon66Ci,Jon66Cii,Jon74E,SPH93,thetaTry,Uch	Jonah 65Ai,Jonah 65Aii,Jonah 66Ci,Jonah 66Cii,Jonah 74E,Serine protease homolog 93,thetaTrypsin,Ubiquitin carboxy-terminal hydrolase,uncharacterized protein
Under-expressed 24 AEL	133	Molecular function	oxidoreductase activity, acting on diphenols and related substances as donors, oxygen as acceptor	GO:0016682	0.00013	Inf	2	2	0.02	1	0.015	PPO1,PPO2	Prophenoloxidase 1,Prophenoloxidase 2
Under-expressed 24 AEL	133	Molecular function	L-DOPA monooxygenase activity	GO:0036263	0.00013	Inf	2	2	0.02	1	0.015	PPO1,PPO2	Prophenoloxidase 1,Prophenoloxidase 2
Under-expressed 24 AEL	133	Molecular function	dopamine monooxygenase activity	GO:0036264	0.00013	Inf	2	2	0.02	1	0.015	PPO1,PPO2	Prophenoloxidase 1,Prophenoloxidase 2
Under-expressed 24 AEL	133	Molecular function	oxidoreductase activity, acting on single donors with incorporation of molecular oxygen	GO:0016701	0.00014	17.97	4	24	0.28	0.167	0.03	CG31371,CG6910,CG9698,PH4alphaMP	prolyl-4-hydroxylase-alpha MP,uncharacterized protein
Under-expressed 24 AEL	133	Molecular function	procollagen-proline 4-dioxygenase activity	GO:0004656	0.00023	33.38	3	11	0.13	0.273	0.023	CG31371,CG9698,PH4alphaMP	prolyl-4-hydroxylase-alpha MP,uncharacterized protein
Under-expressed 24 AEL	133	Molecular function	peptidyl-proline dioxygenase activity	GO:0031543	0.0006	22.24	3	15	0.17	0.2	0.023	CG31371,CG9698,PH4alphaMP	prolyl-4-hydroxylase-alpha MP,uncharacterized protein
Under-expressed 24 AEL	133	Molecular function	sterol binding	GO:0032934	0.00073	20.53	3	16	0.18	0.188	0.023	Npc2d,Npc2g,Npc2h	Niemann-Pick type C-2d,Niemann-Pick type C-2g,Niemann-Pick type C-2h
Over-expressed 48 AEL	1301	Biological process	nervous system process	GO:0050877	2.4e-09	2.23	86	410	45.67	0.21	0.066	2mit,5-HT1A,Ac78C,Alk,alpha-Est1,amn,Arr1,Arr2,Ca-alpha1T,cac,CG2698,CG31300,CG34371,CG4025,CG7778,CG9447,CG9492,CheB42c,chico,Desi,Dhc93AB,dia,dlp,Dop1R1,Dop2R,dpr11,dpr12,dpr16,dpr18,dpr2,dpr20,dpr4,dpr5,dpr6,drl,dysc,eag,Ets96B,FoxP,futsch,GluClalpha,Gr33a,Gr39a,Gr94a,Grd,hiw,iav,inaC,Ir21a,Ir25a,Ir76b,meru,mGluR,mura,nAChRalpha2,nAChRalpha3,nAChRalpha5,nAChRalpha6,nAChRalpha7,NaCP60E,Nmdar2,O…	2mit,5-hydroxytryptamine (serotonin) receptor 1A,Adenylyl cyclase 78C,alpha-Esterase-1,amnesiac,Anaplastic lymphoma kinase,Arrestin 1,Arrestin 2,Ca[2+]-channel protein alpha[[1]] subunit T,cacophony,Chemosensory protein B 42c,chico,dally-like,defective proboscis extension response 11,defective proboscis extension response 12,defective proboscis extension response 16,defective proboscis extension …
Over-expressed 48 AEL	1301	Biological process	signaling	GO:0023052	9.6e-08	1.55	237	1578	175.78	0.15	0.182	amn,Arr1,Atg9,bun,Ca-alpha1T,cac,CCKLR-17D1,CCKLR-17D3,CG10362,CG10702,CG13995,CG1657,CG16721,CG32547,CG32683,CG34393,CG42366,CG42450,CG42541,CG5160,CG5937,CG5953,CG9098,Cngl,Coop,Dh44-R1,dimm,DJ-1alpha,Dop2R,Drl-2,eag,erm,ewg,Fs,GABA-B-R3,Gadd45,gcl,Gpb5,Gyc32E,hiw,IMPPP,Ir21a,Ir25a,lbm,Listericin,magu,mio,Mnn1,Myc,nAChRalpha3,nAChRalpha5,nAChRalpha6,nAChRalpha7,NimA,ninaC,Nlg2,Nmdar2,Nos,p38c,p…	amnesiac,Arrestin 1,Autophagy-related 9,bunched,Ca[2+]-channel protein alpha[[1]] subunit T,cacophony,Cholecystokinin-like receptor at 17D1,Cholecystokinin-like receptor at 17D3,Corepressor of Pangolin,Cyclic nucleotide-gated ion channel-like,Derailed 2,dimmed,Diuretic hormone 44 receptor 1,DJ-1alpha,Dopamine 2-like receptor,earmuff,erect wing,ether a go-go,Follistatin,germ cell-less,Glycoprotein…
Over-expressed 48 AEL	1301	Biological process	sensory perception of chemical stimulus	GO:0007606	1.8e-07	3.64	29	94	10.47	0.309	0.022	Ac78C,Arr1,Arr2,CheB42c,Desi,dpr11,dpr12,dpr16,dpr18,dpr2,dpr20,dpr4,dpr5,dpr6,eag,Gr33a,Gr39a,Gr94a,iav,Ir21a,Ir25a,Ir76b,Obp18a,Obp49a,Obp56d,Obp56h,Or82a,rdgB,Sh	Adenylyl cyclase 78C,Arrestin 1,Arrestin 2,Chemosensory protein B 42c,defective proboscis extension response 11,defective proboscis extension response 12,defective proboscis extension response 16,defective proboscis extension response 18,defective proboscis extension response 2,defective proboscis extension response 20,defective proboscis extension response 4,defective proboscis extension respons…
Over-expressed 48 AEL	1301	Biological process	cell communication	GO:0007154	1.1e-06	1.5	223	1531	168.42	0.146	0.171	amn,Arr1,Atg8a,bun,Ca-alpha1T,cac,CCKLR-17D1,CCKLR-17D3,CG10362,CG10702,CG13995,CG1657,CG16721,CG32547,CG32683,CG34393,CG42366,CG42450,CG42541,CG5160,CG5937,CG5953,CG9098,Cngl,Coop,Dh44-R1,dimm,DJ-1alpha,Dop2R,Drl-2,eag,erm,ewg,Fs,GABA-B-R3,Gadd45,gcl,Gpb5,Gyc32E,hiw,IMPPP,Ir21a,Ir25a,lbm,Listericin,magu,mio,Mnn1,Myc,nAChRalpha3,nAChRalpha5,nAChRalpha6,nAChRalpha7,NimA,ninaC,Nlg2,Nmdar2,Nos,p38c,…	amnesiac,Arrestin 1,Autophagy-related 8a,bunched,Ca[2+]-channel protein alpha[[1]] subunit T,cacophony,Cholecystokinin-like receptor at 17D1,Cholecystokinin-like receptor at 17D3,Corepressor of Pangolin,Cyclic nucleotide-gated ion channel-like,Derailed 2,dimmed,Diuretic hormone 44 receptor 1,DJ-1alpha,Dopamine 2-like receptor,earmuff,erect wing,ether a go-go,Follistatin,germ cell-less,Glycoprotei…
Over-expressed 48 AEL	1301	Biological process	G protein-coupled receptor signaling pathway	GO:0007186	2.8e-06	2.55	39	165	18.26	0.236	0.03	5-HT1A,5-HT2B,Ac78C,amn,Arr1,Arr2,CCHa1,CCKLR-17D1,CCKLR-17D3,CG13579,CG13995,CG32547,CG34384,CG42450,CG43373,CG43795,CG7497,CNMaR,Dh44-R1,Dop1R1,Dop2R,Ets96B,foxo,GABA-B-R3,Galphaf,Gbeta76C,inaC,Lgr3,mGluR,MsR1,mthl8,ninaC,NPFR,Nplp4,Oamb,Octbeta1R,Octbeta3R,PK1-R,PK2-R2,Proc,rdgB,rdgC,Rh5,Rh6,RYa-R,SIFaR,smog,TkR86C	5-hydroxytryptamine (serotonin) receptor 1A,5-hydroxytryptamine (serotonin) receptor 2B,Adenylyl cyclase 78C,amnesiac,Arrestin 1,Arrestin 2,CCHamide-1,Cholecystokinin-like receptor at 17D1,Cholecystokinin-like receptor at 17D3,CNMamide Receptor,Diuretic hormone 44 receptor 1,Dopamine 1-like receptor 1,Dopamine 2-like receptor,Ets96B,forkhead box, sub-group O,G protein alpha f subunit,G protein be…
Over-expressed 48 AEL	1301	Biological process	antibacterial humoral response	GO:0019731	3.4e-06	5.18	16	41	4.57	0.39	0.012	AttA,AttB,AttC,AttD,CecA1,CecA2,dnr1,DptB,Dro,Drs,IM3,IMPPP,Mtk,PGRP-LF,Rel,Thor	Attacin-A,Attacin-B,Attacin-C,Attacin-D,Cecropin A1,Cecropin A2,defense repressor 1,Diptericin B,Drosocin,Drosomycin,Immune induced molecule 3,Immune induced molecule prepropeptide,Metchnikowin,Peptidoglycan recognition protein LF,Relish,thor
Over-expressed 48 AEL	1301	Biological process	detection of light stimulus	GO:0009583	4.6e-06	4.42	18	51	5.68	0.353	0.014	Arr1,Arr2,cac,Cerk,dlp,Gbeta76C,inaC,laza,ninaC,pinta,PIP5K59B,rdgB,rdgC,Rh5,Rh6,rtp,Sh,trpl	Arrestin 1,Arrestin 2,cacophony,Ceramide kinase,dally-like,G protein beta-subunit 76C,inactivation no afterpotential C,lazaro,neither inactivation nor afterpotential C,Phosphatidylinositol 4-phosphate 5-kinase at 59B,prolonged depolarization afterpotential (PDA) is not apparent,retinal degeneration B,retinal degeneration C,retinophilin,Rhodopsin 5,Rhodopsin 6,Shaker,transient receptor potential-l…
Over-expressed 48 AEL	1301	Biological process	intestinal epithelial structure maintenance	GO:0060729	1.2e-05	48.16	6	7	0.78	0.857	0.005	Atg1,Atg13,Atg17,Atg9,upd2,upd3	Autophagy-related 1,Autophagy-related 13,Autophagy-related 17,Autophagy-related 9,unpaired 2,unpaired 3
Over-expressed 48 AEL	1301	Biological process	detection of stimulus	GO:0051606	3.2e-05	4.08	16	48	5.3	0.333	0.012	Ac78C,Arr1,Arr2,cac,Cerk,CheB42c,dlp,Gbeta76C,GNBP-like3,inaC,Ir21a,Ir25a,Ir62a,Ir76b,laza,ninaC,Or82a,pinta,PIP5K59B,prim,rdgB,rdgC,Rh5,Rh6,rtp,Sh,stj,trpl	Adenylyl cyclase 78C,Arrestin 1,Arrestin 2,cacophony,Ceramide kinase,Chemosensory protein B 42c,dally-like,G protein beta-subunit 76C,GNBP-like 3,inactivation no afterpotential C,Ionotropic receptor 21a,Ionotropic receptor 25a,Ionotropic receptor 62a,Ionotropic receptor 76b,lazaro,neither inactivation nor afterpotential C,Odorant receptor 82a,Phosphatidylinositol 4-phosphate 5-kinase at 59B,prima…
Over-expressed 48 AEL	1301	Biological process	defense response to Gram-positive bacterium	GO:0050830	3.5e-05	4.04	16	48	5.35	0.333	0.012	AttA,AttB,AttC,AttD,CecA1,CecA2,DptB,Dro,edin,Listericin,modSP,Mtk,PGRP-LF,PGRP-SB1,PGRP-SC1a,PGRP-SC1b	Attacin-A,Attacin-B,Attacin-C,Attacin-D,Cecropin A1,Cecropin A2,Diptericin B,Drosocin,elevated during infection,listericin,Metchnikowin,modular serine protease,Peptidoglycan recognition protein LF,Peptidoglycan recognition protein SB1,Peptidoglycan recognition protein SC1a,Peptidoglycan recognition protein SC1b
Over-expressed 48 AEL	1301	Biological process	mating behavior	GO:0007617	6.1e-05	2.67	26	105	11.7	0.248	0.02	5-HT1A,amn,cac,CG10433,dati,eag,Esp,FoxP,Gr33a,Gr39a,Gr94a,Ilp3,InR,lectin-46Ca,lectin-46Cb,Lnk,mGluR,Nlg2,Oamb,Obp56h,para,Pde1c,Sh,SIFaR,ss,to	5-hydroxytryptamine (serotonin) receptor 1A,amnesiac,cacophony,datilografo,Epidermal stripes and patches,ether a go-go,Forkhead box P,Gustatory receptor 33a,Gustatory receptor 39a,Gustatory receptor 94a,Insulin-like peptide 3,Insulin-like receptor,lectin-46Ca,lectin-46Cb,Lnk,metabotropic Glutamate Receptor,Neuroligin 2,Octopamine receptor in mushroom bodies,Odorant-binding protein 56h,paralytic,P…
Over-expressed 48 AEL	1301	Biological process	response to starvation	GO:0042594	8.6e-05	3.48	17	57	6.27	0.298	0.013	Atg1,Atg17,Atg18a,Atg6,Atg8a,Atg9,Bruce,CG10924,chico,Crtc,Dop1R1,Ets96B,foxo,Gnmt,Iml1,ImpL2,InR,Lst,mio,mthl8,Myc,Oamb,p53,Pepck,Pi3K59F,Rel,REPTOR,REPTOR-BP,Rheb,Ric,rudhira,Slob,SNF4Agamma,Syx17,Thor,to,Wdr59	Autophagy-related 1,Autophagy-related 17,Autophagy-related 18a,Autophagy-related 6,Autophagy-related 8a,Autophagy-related 9,BIR repeat containing ubiquitin-conjugating enzyme,chico,CREB-regulated transcription coactivator,Dopamine 1-like receptor 1,Ecdysone-inducible gene L2,Ets96B,forkhead box, sub-group O,Glycine N-methyltransferase,Increased minichromosome loss 1,Insulin-like receptor,Limostat…
Over-expressed 48 AEL	1301	Biological process	entry into reproductive diapause	GO:0055116	9.3e-05	40.09	5	6	0.67	0.833	0.004	chico,foxo,Ilp3,ImpL2,InR	chico,Ecdysone-inducible gene L2,forkhead box, sub-group O,Insulin-like peptide 3,Insulin-like receptor
Over-expressed 48 AEL	1301	Biological process	anatomical structure homeostasis	GO:0060249	0.00013	2.24	33	153	17.04	0.216	0.025	Arr1,Arr2,Atg1,Atg13,Atg17,Atg9,cac,cav,Cbp53E,chico,Csk,DJ-1alpha,Dop1R1,dysc,InR,Irbp,Mkp3,mre11,nAChRalpha6,Nap1,ninaC,p53,Pi3K59F,rad50,RanBPM,Smg5,Smg6,sqa,srp,Syx17,upd2,upd3,ver	Arrestin 1,Arrestin 2,Autophagy-related 1,Autophagy-related 13,Autophagy-related 17,Autophagy-related 9,C-terminal Src kinase,cacophony,Calbindin 53E,caravaggio,chico,DJ-1alpha,Dopamine 1-like receptor 1,dyschronic,Insulin-like receptor,Inverted repeat-binding protein,meiotic recombination 11,Mitogen-activated protein kinase phosphatase 3,neither inactivation nor afterpotential C,nicotinic Acetyl…
Over-expressed 48 AEL	1301	Biological process	response to extracellular stimulus	GO:0009991	0.00017	3	19	71	7.81	0.268	0.015	Atg1,Atg17,Atg18a,Atg6,Atg8a,Atg9,Bruce,CG10924,CG32206,CG34402,chico,Crtc,Dop1R1,Ets96B,foxo,Gnmt,Iml1,ImpL2,InR,Lst,mio,mthl8,Myc,Oamb,p53,Pepck,Pi3K59F,Rel,REPTOR,REPTOR-BP,Rheb,Ric,rudhira,Sh,Slob,SNF4Agamma,Syx17,Thor,to,Wdr59	Autophagy-related 1,Autophagy-related 17,Autophagy-related 18a,Autophagy-related 6,Autophagy-related 8a,Autophagy-related 9,BIR repeat containing ubiquitin-conjugating enzyme,chico,CREB-regulated transcription coactivator,Dopamine 1-like receptor 1,Ecdysone-inducible gene L2,Ets96B,forkhead box, sub-group O,Glycine N-methyltransferase,Increased minichromosome loss 1,Insulin-like receptor,Limostat…
Over-expressed 48 AEL	1301	Biological process	cellular response to starvation	GO:0009267	0.00021	2.84	20	77	8.58	0.26	0.015	Atg1,Atg17,Atg18a,Atg6,Atg8a,Atg9,Bruce,chico,foxo,Gnmt,Iml1,InR,Lst,mio,p53,Pi3K59F,Rel,SNF4Agamma,Syx17,Wdr59	Autophagy-related 1,Autophagy-related 17,Autophagy-related 18a,Autophagy-related 6,Autophagy-related 8a,Autophagy-related 9,BIR repeat containing ubiquitin-conjugating enzyme,chico,forkhead box, sub-group O,Glycine N-methyltransferase,Increased minichromosome loss 1,Insulin-like receptor,Limostatin,missing oocyte,p53,Phosphotidylinositol 3 kinase 59F,Relish,SNF4/AMP-activated protein kinase gamma…
Over-expressed 48 AEL	1301	Biological process	cellular response to extracellular stimulus	GO:0031668	0.00022	2.74	21	83	9.25	0.253	0.016	Atg1,Atg17,Atg18a,Atg6,Atg8a,Atg9,Bruce,chico,foxo,Gnmt,Iml1,InR,Lst,mio,Myc,p53,Pi3K59F,Rel,SNF4Agamma,Syx17,Wdr59	Autophagy-related 1,Autophagy-related 17,Autophagy-related 18a,Autophagy-related 6,Autophagy-related 8a,Autophagy-related 9,BIR repeat containing ubiquitin-conjugating enzyme,chico,forkhead box, sub-group O,Glycine N-methyltransferase,Increased minichromosome loss 1,Insulin-like receptor,Limostatin,missing oocyte,Myc,p53,Phosphotidylinositol 3 kinase 59F,Relish,SNF4/AMP-activated protein kinase g…
Over-expressed 48 AEL	1301	Biological process	cellular response to stimulus	GO:0051716	0.00024	1.34	223	1653	181.85	0.135	0.171	amn,Arr1,Atg18b,Atg8a,bun,cac,CCKLR-17D1,CCKLR-17D3,CG10362,CG10702,CG12896,CG13995,CG1657,CG16721,CG32547,CG32683,CG34393,CG42366,CG42450,CG42541,CG5160,CG5937,CG9003,CG9098,CG9272,Cngl,Coop,Cyp18a1,Cyp6g2,Dop2R,Drat,eag,erm,ewg,Fs,GABA-B-R3,Gadd45,gcl,Gpb5,Gyc32E,hiw,Irbp,lbm,Listericin,magu,mio,Mnn1,mre11,Myc,nAChRalpha3,nAChRalpha5,nAChRalpha6,nAChRalpha7,NimA,ninaC,Nmdar2,Nos,p38c,p53,PCNA2,…	amnesiac,Arrestin 1,Autophagy-related 18b,Autophagy-related 8a,bunched,cacophony,Cholecystokinin-like receptor at 17D1,Cholecystokinin-like receptor at 17D3,Corepressor of Pangolin,Cyclic nucleotide-gated ion channel-like,Cyp6g2,Cytochrome P450-18a1,Death resistor Adh domain containing target,Dopamine 2-like receptor,earmuff,erect wing,ether a go-go,Follistatin,germ cell-less,Glycoprotein hormone…
Over-expressed 48 AEL	1301	Biological process	regulation of membrane potential	GO:0042391	0.00026	3.24	16	56	6.21	0.286	0.012	Ca-alpha1T,cac,eag,Ekar,Fife,GluClalpha,Grd,jus,nAChRalpha2,nAChRalpha3,nAChRalpha5,nAChRalpha6,nAChRalpha7,NaCP60E,para,Rdl,Sh,Shab,SK,SLO2,Slob	Ca[2+]-channel protein alpha[[1]] subunit T,cacophony,ether a go-go,Eye-enriched kainate receptor,fife,GluClalpha,Glycine receptor,julius seizure,Na channel protein 60E,nicotinic Acetylcholine Receptor alpha2,nicotinic Acetylcholine Receptor alpha3,nicotinic Acetylcholine Receptor alpha5,nicotinic Acetylcholine Receptor alpha6,nicotinic Acetylcholine Receptor alpha7,paralytic,Resistant to dieldri…
Over-expressed 48 AEL	1301	Biological process	protein complex oligomerization	GO:0051259	0.00032	3.53	14	46	5.12	0.304	0.011	CG32206,CG34189,CG34384,CG34402,Crtc,eag,Gnmt,Hk,InR,PCNA2,Sh,Shab,Shaw,Trpm	CREB-regulated transcription coactivator,ether a go-go,Glycine N-methyltransferase,Hyperkinetic,Insulin-like receptor,Proliferating cell nuclear antigen 2,Shaker,Shaker cognate b,Shaker cognate w,Transient receptor potential cation channel, subfamily M,uncharacterized protein
Over-expressed 48 AEL	1301	Biological process	selective autophagy	GO:0061912	0.00035	8.03	7	14	1.56	0.5	0.005	Atg1,Atg13,Atg17,Atg18a,Atg6,Atg9,ref(2)P	Autophagy-related 1,Autophagy-related 13,Autophagy-related 17,Autophagy-related 18a,Autophagy-related 6,Autophagy-related 9,refractory to sigma P
Over-expressed 48 AEL	1301	Biological process	second-messenger-mediated signaling	GO:0019932	0.00044	2.51	22	93	10.36	0.237	0.017	Ac78C,amn,cac,CG16721,CG42260,CG43373,CG7497,Cngl,Dop1R1,Dop2R,Gyc32E,Gycbeta100B,inaC,Lgr3,Lst,Nos,Nox,Octbeta1R,Octbeta3R,rdgC,TpnC41C,trpl	Adenylyl cyclase 78C,amnesiac,cacophony,Cyclic nucleotide-gated ion channel-like,Dopamine 1-like receptor 1,Dopamine 2-like receptor,Guanyl cyclase at 32E,Guanylyl cyclase beta-subunit at 100B,inactivation no afterpotential C,Leucine-rich repeat-containing G protein-coupled receptor 3,Limostatin,NADPH oxidase,Nitric oxide synthase,Octopamine beta1 receptor,Octopamine beta3 receptor,retinal degene…
Over-expressed 48 AEL	1301	Biological process	sensory perception of light stimulus	GO:0050953	0.00056	5.84	8	19	2.12	0.421	0.006	cac,CG4025,dlp,dysc,inaC,Rh5,Rh6,trpl	cacophony,dally-like,dyschronic,inactivation no afterpotential C,Rhodopsin 5,Rhodopsin 6,transient receptor potential-like,uncharacterized protein
Over-expressed 48 AEL	1301	Biological process	dendrite self-avoidance	GO:0070593	0.00056	5.84	8	19	2.12	0.421	0.006	bdl,CG44153,Dscam2,Dscam3,Dscam4,fry,ImpL2,Sema2b	borderless,Down syndrome cell adhesion molecule 2,Down syndrome cell adhesion molecule 3,Down syndrome cell adhesion molecule 4,Ecdysone-inducible gene L2,furry,Semaphorin 2b,uncharacterized protein
Over-expressed 48 AEL	1301	Biological process	detection of stimulus involved in sensory perception	GO:0050906	0.00059	3.72	12	38	4.23	0.316	0.009	Ac78C,cac,dlp,inaC,Ir21a,Ir25a,Ir76b,Or82a,prim,rdgC,stj,trpl	Adenylyl cyclase 78C,cacophony,dally-like,inactivation no afterpotential C,Ionotropic receptor 21a,Ionotropic receptor 25a,Ionotropic receptor 76b,Odorant receptor 82a,primacord,retinal degeneration C,straightjacket,transient receptor potential-like
Over-expressed 48 AEL	1301	Biological process	autophagosome organization	GO:1905037	0.00059	4.02	11	33	3.68	0.333	0.008	Atg1,Atg101,Atg13,Atg17,Atg18a,Atg18b,Atg6,Atg8a,Atg9,mv,Pi3K59F	Autophagy-related 1,Autophagy-related 101,Autophagy-related 13,Autophagy-related 17,Autophagy-related 18a,Autophagy-related 18b,Autophagy-related 6,Autophagy-related 8a,Autophagy-related 9,mauve,Phosphotidylinositol 3 kinase 59F
Over-expressed 48 AEL	1301	Biological process	tissue regeneration	GO:0042246	0.0006	7.02	7	15	1.67	0.467	0.005	Alr,bun,Idgf1,p53,Spn88Eb,Sxl,Top3alpha	Augmenter of liver regeneration,bunched,Imaginal disc growth factor 1,p53,Serpin 88Eb,Sex lethal,Topoisomerase 3alpha
Over-expressed 48 AEL	1301	Biological process	adaptation of signaling pathway	GO:0023058	0.0007	32.04	4	5	0.56	0.8	0.003	Arr1,Arr2,inaC,ninaC	Arrestin 1,Arrestin 2,inactivation no afterpotential C,neither inactivation nor afterpotential C
Over-expressed 48 AEL	1301	Biological process	IMP metabolic process	GO:0046040	0.0007	32.04	4	5	0.56	0.8	0.003	ade2,ade5,AdSS,AMPdeam	ade5,adenosine 2,Adenylosuccinate Synthetase,AMP deaminase
Over-expressed 48 AEL	1301	Biological process	phototransduction, visible light	GO:0007603	0.0007	4.82	9	24	2.67	0.375	0.007	Arr1,Arr2,Gbeta76C,inaC,ninaC,PIP5K59B,rdgB,rdgC,trpl	Arrestin 1,Arrestin 2,G protein beta-subunit 76C,inactivation no afterpotential C,neither inactivation nor afterpotential C,Phosphatidylinositol 4-phosphate 5-kinase at 59B,retinal degeneration B,retinal degeneration C,transient receptor potential-like
Over-expressed 48 AEL	1301	Biological process	epithelial structure maintenance	GO:0010669	0.0007	4.82	9	24	2.67	0.375	0.007	Atg1,Atg13,Atg17,Atg9,Csk,Mkp3,Pi3K59F,upd2,upd3	Autophagy-related 1,Autophagy-related 13,Autophagy-related 17,Autophagy-related 9,C-terminal Src kinase,Mitogen-activated protein kinase phosphatase 3,Phosphotidylinositol 3 kinase 59F,unpaired 2,unpaired 3
Over-expressed 48 AEL	1301	Biological process	action potential	GO:0001508	0.00071	13.36	5	8	0.89	0.625	0.004	Ca-alpha1T,Grd,NaCP60E,Sh,Shab	Ca[2+]-channel protein alpha[[1]] subunit T,Glycine receptor,Na channel protein 60E,Shaker,Shaker cognate b
Over-expressed 48 AEL	1301	Biological process	response to light intensity	GO:0009642	0.00071	13.36	5	8	0.89	0.625	0.004	Arr2,Ekar,inaC,laza,ninaC	Arrestin 2,Eye-enriched kainate receptor,inactivation no afterpotential C,lazaro,neither inactivation nor afterpotential C
Over-expressed 48 AEL	1301	Biological process	dormancy process	GO:0022611	0.00071	13.36	5	8	0.89	0.625	0.004	chico,foxo,Ilp3,ImpL2,InR	chico,Ecdysone-inducible gene L2,forkhead box, sub-group O,Insulin-like peptide 3,Insulin-like receptor
Over-expressed 48 AEL	1301	Biological process	cellular response to light stimulus	GO:0071482	0.00079	3.85	11	34	3.79	0.324	0.008	Arr1,Arr2,Ekar,Gbeta76C,inaC,ninaC,PIP5K59B,rdgB,rdgC,Rh5,Rh6	Arrestin 1,Arrestin 2,Eye-enriched kainate receptor,G protein beta-subunit 76C,inactivation no afterpotential C,neither inactivation nor afterpotential C,Phosphatidylinositol 4-phosphate 5-kinase at 59B,retinal degeneration B,retinal degeneration C,Rhodopsin 5,Rhodopsin 6
Over-expressed 48 AEL	1301	Biological process	chemosensory behavior	GO:0007635	0.00085	2.56	19	79	8.8	0.241	0.015	Alk,amn,CG13377,chico,Dop1R1,drl,futsch,Gr33a,Gr39a,Gr94a,NaCP60E,NPFR,Oamb,Obp56d,Obp56h,Pino,rad,Rdl,Sh	amnesiac,Anaplastic lymphoma kinase,chico,derailed,Dopamine 1-like receptor 1,futsch,Gustatory receptor 33a,Gustatory receptor 39a,Gustatory receptor 94a,Na channel protein 60E,Neuropeptide F receptor,Octopamine receptor in mushroom bodies,Odorant-binding protein 56d,Odorant-binding protein 56h,Pinocchio,radish,Resistant to dieldrin,Shaker,uncharacterized protein
Over-expressed 48 AEL	1301	Biological process	deactivation of rhodopsin mediated signaling	GO:0016059	0.00096	6.24	7	16	1.78	0.438	0.005	Arr1,Arr2,Gbeta76C,inaC,ninaC,rdgB,rdgC	Arrestin 1,Arrestin 2,G protein beta-subunit 76C,inactivation no afterpotential C,neither inactivation nor afterpotential C,retinal degeneration B,retinal degeneration C
Over-expressed 48 AEL	1301	Biological process	regulation of G protein-coupled receptor signaling pathway	GO:0008277	0.00099	4.52	9	25	2.78	0.36	0.007	Arr1,Arr2,Ets96B,foxo,Gbeta76C,inaC,ninaC,rdgB,rdgC	Arrestin 1,Arrestin 2,Ets96B,forkhead box, sub-group O,G protein beta-subunit 76C,inactivation no afterpotential C,neither inactivation nor afterpotential C,retinal degeneration B,retinal degeneration C
Over-expressed 48 AEL	1301	Biological process	larval midgut cell programmed cell death	GO:0035096	0.00099	4.52	9	25	2.78	0.36	0.007	Atg1,Atg101,Atg13,Atg17,Atg18a,Atg6,Atg8a,Atg9,Pi3K59F	Autophagy-related 1,Autophagy-related 101,Autophagy-related 13,Autophagy-related 17,Autophagy-related 18a,Autophagy-related 6,Autophagy-related 8a,Autophagy-related 9,Phosphotidylinositol 3 kinase 59F
Over-expressed 48 AEL	1301	Molecular function	molecular transducer activity	GO:0060089	3.2e-11	2.75	71	291	31.96	0.244	0.055	5-HT1A,5-HT2B,Alk,CCKLR-17D1,CCKLR-17D3,CG10702,CG13579,CG13995,CG31760,CG32206,CG32547,CG34402,CG43795,CG44153,CG7497,CNMaR,Dh44-R1,Dop1R1,Dop2R,drl,Drl-2,Ekar,ftz-f1,GABA-B-R3,GluClalpha,GluRIA,GNBP2,Gr33a,Gr39a,Gr94a,Grd,Gyc32E,InR,Ir21a,Ir25a,Ir76b,kek6,Lgr3,Met,mGluR,MsR1,mthl8,nAChRalpha2,nAChRalpha3,nAChRalpha5,nAChRalpha6,nAChRalpha7,Nlg2,Nlg3,Nmdar2,NPFR,Oamb,Octbeta1R,Octbeta3R,Or82a,PG…	5-hydroxytryptamine (serotonin) receptor 1A,5-hydroxytryptamine (serotonin) receptor 2B,Anaplastic lymphoma kinase,Cholecystokinin-like receptor at 17D1,Cholecystokinin-like receptor at 17D3,CNMamide Receptor,derailed,Derailed 2,Diuretic hormone 44 receptor 1,Dopamine 1-like receptor 1,Dopamine 2-like receptor,Eye-enriched kainate receptor,ftz transcription factor 1,GluClalpha,Glutamate receptor …
Over-expressed 48 AEL	1301	Molecular function	G protein-coupled receptor activity	GO:0004930	1.1e-08	3.92	32	100	10.98	0.32	0.025	5-HT1A,5-HT2B,CCKLR-17D1,CCKLR-17D3,CG13579,CG13995,CG31760,CG32547,CG43795,CG44153,CG7497,CNMaR,Dh44-R1,Dop1R1,Dop2R,GABA-B-R3,Lgr3,mGluR,MsR1,mthl8,NPFR,Oamb,Octbeta1R,Octbeta3R,PK1-R,PK2-R2,Rh5,Rh6,RYa-R,SIFaR,smog,TkR86C	5-hydroxytryptamine (serotonin) receptor 1A,5-hydroxytryptamine (serotonin) receptor 2B,Cholecystokinin-like receptor at 17D1,Cholecystokinin-like receptor at 17D3,CNMamide Receptor,Diuretic hormone 44 receptor 1,Dopamine 1-like receptor 1,Dopamine 2-like receptor,Leucine-rich repeat-containing G protein-coupled receptor 3,metabotropic GABA-B receptor subtype 3,metabotropic Glutamate Receptor,met…
Over-expressed 48 AEL	1301	Molecular function	ion gated channel activity	GO:0022839	1.9e-08	3.91	31	97	10.65	0.32	0.024	Ca-alpha1T,cac,CG15270,CG42260,CG4587,Cngl,eag,Ekar,GluClalpha,GluRIA,Grd,Hk,Ir21a,Ir25a,Ir62a,Ir76b,nAChRalpha2,nAChRalpha3,nAChRalpha5,nAChRalpha6,nAChRalpha7,NaCP60E,Nmdar2,Rdl,Sh,Shab,Shaw,SK,SLO2,stj,Trpm	Ca[2+]-channel protein alpha[[1]] subunit T,cacophony,Cyclic nucleotide-gated ion channel-like,ether a go-go,Eye-enriched kainate receptor,GluClalpha,Glutamate receptor IA,Glycine receptor,Hyperkinetic,Ionotropic receptor 21a,Ionotropic receptor 25a,Ionotropic receptor 62a,Ionotropic receptor 76b,Na channel protein 60E,nicotinic Acetylcholine Receptor alpha2,nicotinic Acetylcholine Receptor alpha…
Over-expressed 48 AEL	1301	Molecular function	neurotransmitter receptor activity	GO:0030594	2.3e-08	5.51	22	55	6.04	0.4	0.017	5-HT1A,5-HT2B,CG43795,Dop1R1,Dop2R,Ekar,GABA-B-R3,GluRIA,Grd,Ir21a,Ir25a,Ir76b,nAChRalpha2,nAChRalpha3,nAChRalpha5,nAChRalpha6,nAChRalpha7,Nmdar2,Oamb,Octbeta1R,Octbeta3R,Rdl	5-hydroxytryptamine (serotonin) receptor 1A,5-hydroxytryptamine (serotonin) receptor 2B,Dopamine 1-like receptor 1,Dopamine 2-like receptor,Eye-enriched kainate receptor,Glutamate receptor IA,Glycine receptor,Ionotropic receptor 21a,Ionotropic receptor 25a,Ionotropic receptor 76b,metabotropic GABA-B receptor subtype 3,nicotinic Acetylcholine Receptor alpha2,nicotinic Acetylcholine Receptor alpha3…
Over-expressed 48 AEL	1301	Molecular function	ion channel activity	GO:0005216	7.1e-08	3.11	38	140	15.38	0.271	0.029	Ca-alpha1T,cac,CG15270,CG1688,CG42260,CG4587,Cngl,eag,Ekar,GluClalpha,GluRIA,Grd,Hk,iav,Ir21a,Ir25a,Ir62a,Ir76b,nAChRalpha2,nAChRalpha3,nAChRalpha5,nAChRalpha6,nAChRalpha7,NaCP60E,Nmdar2,para,Rdl,Sh,Shab,Shaw,SK,SLO2,stj,Task6,trpl,Trpm,unc80,wtrw	Ca[2+]-channel protein alpha[[1]] subunit T,cacophony,Cyclic nucleotide-gated ion channel-like,ether a go-go,Eye-enriched kainate receptor,GluClalpha,Glutamate receptor IA,Glycine receptor,Hyperkinetic,inactive,Ionotropic receptor 21a,Ionotropic receptor 25a,Ionotropic receptor 62a,Ionotropic receptor 76b,Na channel protein 60E,nicotinic Acetylcholine Receptor alpha2,nicotinic Acetylcholine Recep…
Over-expressed 48 AEL	1301	Molecular function	channel activity	GO:0015267	5.9e-07	2.8	38	151	16.59	0.252	0.029	Ca-alpha1T,cac,CG15270,CG1688,CG42260,CG4587,Cngl,eag,Ekar,GluClalpha,GluRIA,Grd,Hk,iav,Ir21a,Ir25a,Ir62a,Ir76b,nAChRalpha2,nAChRalpha3,nAChRalpha5,nAChRalpha6,nAChRalpha7,NaCP60E,Nmdar2,para,Rdl,Sh,Shab,Shaw,SK,SLO2,stj,Task6,trpl,Trpm,unc80,wtrw	Ca[2+]-channel protein alpha[[1]] subunit T,cacophony,Cyclic nucleotide-gated ion channel-like,ether a go-go,Eye-enriched kainate receptor,GluClalpha,Glutamate receptor IA,Glycine receptor,Hyperkinetic,inactive,Ionotropic receptor 21a,Ionotropic receptor 25a,Ionotropic receptor 62a,Ionotropic receptor 76b,Na channel protein 60E,nicotinic Acetylcholine Receptor alpha2,nicotinic Acetylcholine Recep…
Over-expressed 48 AEL	1301	Molecular function	transmitter-gated ion channel activity	GO:0022824	1.5e-05	5.61	13	32	3.51	0.406	0.01	Ekar,GluRIA,Grd,Ir21a,Ir25a,Ir76b,nAChRalpha2,nAChRalpha3,nAChRalpha5,nAChRalpha6,nAChRalpha7,Nmdar2,Rdl	Eye-enriched kainate receptor,Glutamate receptor IA,Glycine receptor,Ionotropic receptor 21a,Ionotropic receptor 25a,Ionotropic receptor 76b,nicotinic Acetylcholine Receptor alpha2,nicotinic Acetylcholine Receptor alpha3,nicotinic Acetylcholine Receptor alpha5,nicotinic Acetylcholine Receptor alpha6,nicotinic Acetylcholine Receptor alpha7,NMDA receptor 2,Resistant to dieldrin
Over-expressed 48 AEL	1301	Molecular function	ligand-gated channel activity	GO:0022834	1.7e-05	3.9	18	56	6.15	0.321	0.014	CG42260,Cngl,Ekar,GluClalpha,GluRIA,Grd,Ir21a,Ir25a,Ir62a,Ir76b,nAChRalpha2,nAChRalpha3,nAChRalpha5,nAChRalpha6,nAChRalpha7,Nmdar2,Rdl,Trpm	Cyclic nucleotide-gated ion channel-like,Eye-enriched kainate receptor,GluClalpha,Glutamate receptor IA,Glycine receptor,Ionotropic receptor 21a,Ionotropic receptor 25a,Ionotropic receptor 62a,Ionotropic receptor 76b,nicotinic Acetylcholine Receptor alpha2,nicotinic Acetylcholine Receptor alpha3,nicotinic Acetylcholine Receptor alpha5,nicotinic Acetylcholine Receptor alpha6,nicotinic Acetylcholin…
Over-expressed 48 AEL	1301	Molecular function	cation transmembrane transporter activity	GO:0008324	2.3e-05	2.02	52	267	29.33	0.195	0.04	Ca-alpha1T,cac,CG10804,CG14606,CG15270,CG1628,CG1688,CG3285,CG33282,CG33310,CG42260,CG43066,CG4476,CG4587,CG5646,Cngl,Eaat2,eag,Ekar,GluRIA,Grd,Hk,iav,Ir25a,Ir76b,List,MME1,nAChRalpha2,nAChRalpha3,nAChRalpha5,nAChRalpha6,nAChRalpha7,NaCP60E,Nhe3,NKCC,Nmdar2,para,rdgB,Sh,Shab,Shaw,SK,SLO2,stj,Task6,Tret1-1,trpl,Trpm,unc80,wtrw,Zip99C,ZnT35C	Ca[2+]-channel protein alpha[[1]] subunit T,cacophony,Cyclic nucleotide-gated ion channel-like,ether a go-go,Excitatory amino acid transporter 2,Eye-enriched kainate receptor,Glutamate receptor IA,Glycine receptor,Hyperkinetic,inactive,Ionotropic receptor 25a,Ionotropic receptor 76b,Lithium-inducible SLC6 transporter,Mitochondrial Magnesium Exporter 1,Na channel protein 60E,Na[+]/H[+] hydrogen ex…
Over-expressed 48 AEL	1301	Molecular function	voltage-gated cation channel activity	GO:0022843	2.5e-05	5.78	12	29	3.19	0.414	0.009	Ca-alpha1T,cac,CG4587,eag,Hk,NaCP60E,Nmdar2,Sh,Shab,Shaw,SLO2,stj	Ca[2+]-channel protein alpha[[1]] subunit T,cacophony,ether a go-go,Hyperkinetic,Na channel protein 60E,NMDA receptor 2,Shaker,Shaker cognate b,Shaker cognate w,slowpoke 2,straightjacket,uncharacterized protein
Over-expressed 48 AEL	1301	Molecular function	metal ion transmembrane transporter activity	GO:0046873	8e-05	2.27	34	158	17.35	0.215	0.026	Ca-alpha1T,cac,CG10804,CG1688,CG33310,CG43066,CG4476,CG4587,Eaat2,eag,Ekar,GluRIA,Hk,iav,Ir76b,List,MME1,NaCP60E,Nhe3,NKCC,para,rdgB,Sh,Shab,Shaw,SK,SLO2,stj,Task6,trpl,Trpm,wtrw,Zip99C,ZnT35C	Ca[2+]-channel protein alpha[[1]] subunit T,cacophony,ether a go-go,Excitatory amino acid transporter 2,Eye-enriched kainate receptor,Glutamate receptor IA,Hyperkinetic,inactive,Ionotropic receptor 76b,Lithium-inducible SLC6 transporter,Mitochondrial Magnesium Exporter 1,Na channel protein 60E,Na[+]/H[+] hydrogen exchanger 3,paralytic,retinal degeneration B,Shaker,Shaker cognate b,Shaker cognate …
Over-expressed 48 AEL	1301	Molecular function	excitatory extracellular ligand-gated ion channel activity	GO:0005231	9.1e-05	11.43	7	12	1.32	0.583	0.005	GluClalpha,Grd,nAChRalpha2,nAChRalpha3,nAChRalpha5,nAChRalpha6,nAChRalpha7	GluClalpha,Glycine receptor,nicotinic Acetylcholine Receptor alpha2,nicotinic Acetylcholine Receptor alpha3,nicotinic Acetylcholine Receptor alpha5,nicotinic Acetylcholine Receptor alpha6,nicotinic Acetylcholine Receptor alpha7
Over-expressed 48 AEL	1301	Molecular function	neuropeptide receptor activity	GO:0008188	0.00012	3.96	14	43	4.72	0.326	0.011	CCKLR-17D1,CCKLR-17D3,CG13995,CG32547,CNMaR,Dh44-R1,Lgr3,MsR1,NPFR,PK1-R,PK2-R2,RYa-R,SIFaR,TkR86C	Cholecystokinin-like receptor at 17D1,Cholecystokinin-like receptor at 17D3,CNMamide Receptor,Diuretic hormone 44 receptor 1,Leucine-rich repeat-containing G protein-coupled receptor 3,Myosuppressin receptor 1,Neuropeptide F receptor,Pyrokinin 1 receptor,Pyrokinin 2 receptor 2,RYamide receptor,SIFamide receptor,Tachykinin-like receptor at 86C,uncharacterized protein
Over-expressed 48 AEL	1301	Molecular function	ligand-gated cation channel activity	GO:0099094	0.00022	3.94	13	40	4.39	0.325	0.01	CG42260,Cngl,Ekar,GluRIA,Ir25a,Ir76b,nAChRalpha2,nAChRalpha3,nAChRalpha5,nAChRalpha6,nAChRalpha7,Nmdar2,Trpm	Cyclic nucleotide-gated ion channel-like,Eye-enriched kainate receptor,Glutamate receptor IA,Ionotropic receptor 25a,Ionotropic receptor 76b,nicotinic Acetylcholine Receptor alpha2,nicotinic Acetylcholine Receptor alpha3,nicotinic Acetylcholine Receptor alpha5,nicotinic Acetylcholine Receptor alpha6,nicotinic Acetylcholine Receptor alpha7,NMDA receptor 2,Transient receptor potential cation channe…
Over-expressed 48 AEL	1301	Molecular function	transmembrane signaling receptor activity	GO:0004888	0.00024	2.51	24	105	11.26	0.229	0.018	5-HT1A,5-HT2B,Alk,CCKLR-17D1,CCKLR-17D3,CG10702,CG13579,CG13995,CG31760,CG32547,CG43795,CG44153,CG7497,CNMaR,Dh44-R1,Dop1R1,Dop2R,drl,Drl-2,Ekar,GABA-B-R3,GluClalpha,GluRIA,Gr33a,Gr39a,Gr94a,Grd,InR,Ir21a,Ir25a,Ir76b,Lgr3,mGluR,MsR1,mthl8,nAChRalpha2,nAChRalpha3,nAChRalpha5,nAChRalpha6,nAChRalpha7,Nmdar2,NPFR,Oamb,Octbeta1R,Octbeta3R,Or82a,PK1-R,PK2-R2,Ptp99A,Rdl,Rh5,Rh6,RYa-R,SIFaR,smog,TkR86C	5-hydroxytryptamine (serotonin) receptor 1A,5-hydroxytryptamine (serotonin) receptor 2B,Anaplastic lymphoma kinase,Cholecystokinin-like receptor at 17D1,Cholecystokinin-like receptor at 17D3,CNMamide Receptor,derailed,Derailed 2,Diuretic hormone 44 receptor 1,Dopamine 1-like receptor 1,Dopamine 2-like receptor,Eye-enriched kainate receptor,GluClalpha,Glutamate receptor IA,Glycine receptor,Gustato…
Over-expressed 48 AEL	1301	Molecular function	cell-cell adhesion mediator activity	GO:0098632	0.00025	12.23	6	10	1.1	0.6	0.005	bdl,CG44153,Dscam2,Dscam3,Dscam4,ImpL2	borderless,Down syndrome cell adhesion molecule 2,Down syndrome cell adhesion molecule 3,Down syndrome cell adhesion molecule 4,Ecdysone-inducible gene L2,uncharacterized protein
Over-expressed 48 AEL	1301	Molecular function	voltage-gated channel activity	GO:0022832	0.00029	4.09	12	36	3.95	0.333	0.009	Ca-alpha1T,cac,CG4587,eag,Hk,NaCP60E,Nmdar2,Sh,Shab,Shaw,SLO2,stj	Ca[2+]-channel protein alpha[[1]] subunit T,cacophony,ether a go-go,Hyperkinetic,Na channel protein 60E,NMDA receptor 2,Shaker,Shaker cognate b,Shaker cognate w,slowpoke 2,straightjacket,uncharacterized protein
Over-expressed 48 AEL	1301	Molecular function	ATP-dependent microtubule motor activity, minus-end-directed	GO:0008569	0.00049	9.78	6	11	1.21	0.545	0.005	CG3339,CG9492,Dhc62B,Dhc93AB,Dhc98D,Kif3C	Dynein heavy chain at 62B,Dynein heavy chain at 89D,Dynein heavy chain at 93AB,Kinesin family member 3C,uncharacterized protein
Over-expressed 48 AEL	1301	Molecular function	peptide receptor activity	GO:0001653	0.00071	3.19	14	50	5.49	0.28	0.011	CCKLR-17D1,CCKLR-17D3,CG13995,CG32547,CNMaR,Dh44-R1,Lgr3,MsR1,NPFR,PK1-R,PK2-R2,RYa-R,SIFaR,TkR86C	Cholecystokinin-like receptor at 17D1,Cholecystokinin-like receptor at 17D3,CNMamide Receptor,Diuretic hormone 44 receptor 1,Leucine-rich repeat-containing G protein-coupled receptor 3,Myosuppressin receptor 1,Neuropeptide F receptor,Pyrokinin 1 receptor,Pyrokinin 2 receptor 2,RYamide receptor,SIFamide receptor,Tachykinin-like receptor at 86C,uncharacterized protein
Over-expressed 48 AEL	1301	Molecular function	telomeric DNA binding	GO:0042162	0.00089	8.15	6	12	1.32	0.5	0.005	cav,Irbp,rad50,Smg5,Smg6,ver	caravaggio,Inverted repeat-binding protein,rad50,Smg5,Smg6,verrocchio
Over-expressed 48 AEL	1301	Cellular component	cell projection	GO:0042995	1.7e-15	2.82	100	423	44.87	0.236	0.077	5-HT1A,Alk,ana1,Arr1,Arr2,Atg8a,BBS4,bdl,Burs,Cbp53E,Cc2d2a,CCKLR-17D1,Cep135,cep290,CG10702,CG1126,CG15666,CG15923,CG16719,CG17387,CG32206,CG3339,CG34402,CG42366,CG44153,CG5142,CG9492,ChAT,CLIP-190,cmpy,Dab,Dhc62B,Dhc93AB,Dhc98D,dia,Dop1R1,dpr11,dpr12,dpr18,dpr2,dpr20,dpr4,dpr5,dpr6,drl,Dscam2,Dscam3,Dscam4,dysc,erm,fry,futsch,Gbeta76C,GluClalpha,gogo,Gr33a,Gr39a,Gr94a,Grd,hdc,ImpL2,inaC,InR,Ir2…	5-hydroxytryptamine (serotonin) receptor 1A,Anaplastic lymphoma kinase,anastral spindle 1,Arrestin 1,Arrestin 2,Autophagy-related 8a,Bardet-Biedl syndrome 4,borderless,Bursicon,Calbindin 53E,Centrosomal protein 135kDa,cep290,Cholecystokinin-like receptor at 17D1,Choline acetyltransferase,Coiled-coil and C2 domain containing 2A,crimpy,Cytoplasmic linker protein 190,defective proboscis extension re…
Over-expressed 48 AEL	1301	Cellular component	integral component of plasma membrane	GO:0005887	2.8e-15	2.86	96	401	42.53	0.239	0.074	5-HT1A,Ac78C,Alk,Atet,bdl,beat-Ic,Ca-alpha1T,CadN2,CCKLR-17D1,CG10702,CG11425,CG13404,CG14606,CG1688,CG31814,CG32206,CG3285,CG33282,CG33310,CG34402,CG43373,CG44325,Dh44-R1,DIP-beta,DIP-delta,DIP-eta,Dop1R1,Dop2R,dpr11,dpr18,dpr2,dpr20,dpr5,drl,Drl-2,Dscam2,Dscam3,Dscam4,eag,GABA-B-R3,GluClalpha,GluRIA,Grd,Gyc32E,Hk,iav,InR,Ir25a,Ir76b,ItgaPS4,kek2,kek3,kek6,laza,lbm,Lgr3,mGluR,MsR1,nAChRalpha2,nA…	5-hydroxytryptamine (serotonin) receptor 1A,ABC transporter expressed in trachea,Adenylyl cyclase 78C,Anaplastic lymphoma kinase,beaten path Ic,borderless,Ca[2+]-channel protein alpha[[1]] subunit T,Cadherin-N2,Cholecystokinin-like receptor at 17D1,defective proboscis extension response 11,defective proboscis extension response 18,defective proboscis extension response 2,defective proboscis exten…
Over-expressed 48 AEL	1301	Cellular component	plasma membrane part	GO:0044459	1.6e-10	2.05	123	668	70.86	0.184	0.095	5-HT1A,Ac78C,Atet,bdl,beat-Ic,Ca-alpha1T,cac,CadN2,CCKLR-17D1,CG10702,CG11425,CG13404,CG14606,CG1688,CG31814,CG32206,CG3285,CG33282,CG33310,CG34402,CG43373,CG44325,CG4587,Dh44-R1,dia,DIP-beta,DIP-eta,dlp,Dop1R1,Dop2R,dpr11,dpr18,dpr2,dpr20,dpr4,dpr5,Drl-2,Dscam2,Dscam4,Dyb,eag,Fife,GABA-B-R3,Galphaf,Gbeta76C,gcl,GluRIA,Grd,Gyc32E,Hk,iav,inaC,Ir21a,Ir25a,Ir76b,ItgaPS4,kek2,kek3,laza,lbm,magu,MsR1,…	5-hydroxytryptamine (serotonin) receptor 1A,ABC transporter expressed in trachea,Adenylyl cyclase 78C,beaten path Ic,borderless,Ca[2+]-channel protein alpha[[1]] subunit T,cacophony,Cadherin-N2,Cholecystokinin-like receptor at 17D1,dally-like,defective proboscis extension response 11,defective proboscis extension response 18,defective proboscis extension response 2,defective proboscis extension r…
Over-expressed 48 AEL	1301	Cellular component	intrinsic component of membrane	GO:0031224	3.8e-10	1.81	175	1071	113.6	0.163	0.135	5-HT1A,Atet,Atg9,bdl,beat-Ic,bwa,Ca-alpha1T,cac,CadN2,CCKLR-17D1,CCKLR-17D3,CG10702,CG10804,CG13404,CG13579,CG13995,CG14439,CG15098,CG1572,CG15760,CG1688,CG18609,CG18635,CG2975,CG31272,CG31321,CG31760,CG31814,CG32547,CG3285,CG33282,CG33310,CG33474,CG34120,CG42260,CG43066,CG44325,CG4587,CG8389,CG8399,CG8908,CG9270,Cngl,Cyt-b5-r,Dh44-R1,DIP-beta,DIP-eta,Dop2R,dpr18,dpr2,Drl-2,Dscam4,Eaat2,eag,GABA-…	5-hydroxytryptamine (serotonin) receptor 1A,ABC transporter expressed in trachea,Autophagy-related 9,beaten path Ic,borderless,brain washing,Ca[2+]-channel protein alpha[[1]] subunit T,cacophony,Cadherin-N2,Cholecystokinin-like receptor at 17D1,Cholecystokinin-like receptor at 17D3,Cyclic nucleotide-gated ion channel-like,Cytochrome b5-related,defective proboscis extension response 18,defective p…
Over-expressed 48 AEL	1301	Cellular component	transmembrane transporter complex	GO:1902495	3.4e-09	4.57	29	84	8.91	0.345	0.022	Ca-alpha1T,cac,CG32206,CG33310,CG34402,CG42260,CG4587,Cngl,eag,GluRIA,Hk,iav,Ir25a,Ir76b,nAChRalpha2,nAChRalpha3,nAChRalpha5,nAChRalpha6,nAChRalpha7,NaCP60E,Nmdar2,para,Sh,Shab,Shaw,trpl,Trpm,unc80,wtrw	Ca[2+]-channel protein alpha[[1]] subunit T,cacophony,Cyclic nucleotide-gated ion channel-like,ether a go-go,Glutamate receptor IA,Hyperkinetic,inactive,Ionotropic receptor 25a,Ionotropic receptor 76b,Na channel protein 60E,nicotinic Acetylcholine Receptor alpha2,nicotinic Acetylcholine Receptor alpha3,nicotinic Acetylcholine Receptor alpha5,nicotinic Acetylcholine Receptor alpha6,nicotinic Acety…
Over-expressed 48 AEL	1301	Cellular component	cation channel complex	GO:0034703	1.6e-08	6.37	20	47	4.99	0.426	0.015	Ca-alpha1T,cac,CG42260,CG4587,Cngl,eag,GluRIA,Hk,iav,Ir25a,Ir76b,NaCP60E,para,Sh,Shab,Shaw,trpl,Trpm,unc80,wtrw	Ca[2+]-channel protein alpha[[1]] subunit T,cacophony,Cyclic nucleotide-gated ion channel-like,ether a go-go,Glutamate receptor IA,Hyperkinetic,inactive,Ionotropic receptor 25a,Ionotropic receptor 76b,Na channel protein 60E,paralytic,Shaker,Shaker cognate b,Shaker cognate w,Transient receptor potential cation channel, subfamily M,transient receptor potential-like,uncharacterized protein,uncoordin…
Over-expressed 48 AEL	1301	Cellular component	cell periphery	GO:0071944	3.9e-07	1.61	172	1148	121.77	0.15	0.132	5-HT1A,Ance-4,Atet,bdl,beat-Ic,Ca-alpha1T,cac,CadN2,CCKLR-17D1,CG10483,CG10702,CG10804,CG13404,CG15270,CG1688,CG3078,CG31814,CG32683,CG32812,CG3285,CG33282,CG33310,CG42541,CG44153,CG44325,CG4587,Dh44-R1,dia,DIP-beta,DIP-eta,Dop2R,dos,dpr18,dpr2,dpr20,dpr4,Drl-2,drongo,Dscam4,Dyb,Eaat2,eag,Fife,GABA-B-R3,gcl,GluRIA,Gyc32E,hiw,Hk,iav,ImpL2,inaC,Ir21a,Ir25a,ItgaPS4,kek2,kek3,lbm,List,magu,MsR1,Muc12…	5-hydroxytryptamine (serotonin) receptor 1A,ABC transporter expressed in trachea,Ance-4,beaten path Ic,borderless,Ca[2+]-channel protein alpha[[1]] subunit T,cacophony,Cadherin-N2,Cholecystokinin-like receptor at 17D1,daughter of sevenless,defective proboscis extension response 18,defective proboscis extension response 2,defective proboscis extension response 20,defective proboscis extension resp…
Over-expressed 48 AEL	1301	Cellular component	neuron projection membrane	GO:0032589	1e-05	5.84	13	32	3.39	0.406	0.01	CG32206,CG34402,dpr11,dpr12,dpr18,dpr2,dpr20,dpr4,dpr5,dpr6,Or82a,Rdl,Shaw	defective proboscis extension response 11,defective proboscis extension response 12,defective proboscis extension response 18,defective proboscis extension response 2,defective proboscis extension response 20,defective proboscis extension response 4,defective proboscis extension response 5,defective proboscis extension response 6,Odorant receptor 82a,Resistant to dieldrin,Shaker cognate w,unchara…
Over-expressed 48 AEL	1301	Cellular component	ciliary plasm	GO:0097014	1.2e-05	8.52	10	20	2.12	0.5	0.008	CG17387,CG3339,CG5142,CG9492,Dhc62B,Dhc93AB,Dhc98D,mlt,Oseg2,rempA	Dynein heavy chain at 62B,Dynein heavy chain at 89D,Dynein heavy chain at 93AB,mulet,Outer segment 2,reduced mechanoreceptor potential A,uncharacterized protein
Over-expressed 48 AEL	1301	Cellular component	plasma membrane receptor complex	GO:0098802	1.3e-05	4.75	15	42	4.46	0.357	0.012	CG32206,CG34402,GABA-B-R3,GluRIA,InR,Ir25a,Ir76b,ItgaPS4,mGluR,nAChRalpha2,nAChRalpha3,nAChRalpha5,nAChRalpha6,nAChRalpha7,Nmdar2	Glutamate receptor IA,Insulin-like receptor,Integrin alphaPS4 subunit,Ionotropic receptor 25a,Ionotropic receptor 76b,metabotropic GABA-B receptor subtype 3,metabotropic Glutamate Receptor,nicotinic Acetylcholine Receptor alpha2,nicotinic Acetylcholine Receptor alpha3,nicotinic Acetylcholine Receptor alpha5,nicotinic Acetylcholine Receptor alpha6,nicotinic Acetylcholine Receptor alpha7,NMDA recep…
Over-expressed 48 AEL	1301	Cellular component	phagophore assembly site	GO:0000407	1.8e-05	9.57	9	17	1.8	0.529	0.007	Atg1,Atg101,Atg13,Atg17,Atg18a,Atg18b,Atg6,CG5445,Pi3K59F	Autophagy-related 1,Autophagy-related 101,Autophagy-related 13,Autophagy-related 17,Autophagy-related 18a,Autophagy-related 18b,Autophagy-related 6,Phosphotidylinositol 3 kinase 59F,uncharacterized protein
Over-expressed 48 AEL	1301	Cellular component	rhabdomere	GO:0016028	0.0001	5.2	11	29	3.08	0.379	0.008	Arr1,Arr2,Gbeta76C,inaC,ninaC,PIP5K59B,rdgB,Rh5,Rh6,rtp,trpl	Arrestin 1,Arrestin 2,G protein beta-subunit 76C,inactivation no afterpotential C,neither inactivation nor afterpotential C,Phosphatidylinositol 4-phosphate 5-kinase at 59B,retinal degeneration B,retinophilin,Rhodopsin 5,Rhodopsin 6,transient receptor potential-like
Over-expressed 48 AEL	1301	Cellular component	Atg1/ULK1 kinase complex	GO:1990316	0.00013	Inf	4	4	0.42	1	0.003	Atg1,Atg101,Atg13,Atg17	Autophagy-related 1,Autophagy-related 101,Autophagy-related 13,Autophagy-related 17
Over-expressed 48 AEL	1301	Cellular component	dendrite	GO:0030425	0.00016	2.73	22	91	9.65	0.242	0.017	5-HT1A,Cbp53E,Dop1R1,drl,fry,futsch,Gr33a,Gr39a,Gr94a,hdc,Ir25a,Ir76b,nAChRalpha7,nudE,Oamb,Or82a,plum,Rdl,Shaw,Timp,trpl,unc-104	5-hydroxytryptamine (serotonin) receptor 1A,Calbindin 53E,derailed,Dopamine 1-like receptor 1,furry,futsch,Gustatory receptor 33a,Gustatory receptor 39a,Gustatory receptor 94a,headcase,Ionotropic receptor 25a,Ionotropic receptor 76b,nicotinic Acetylcholine Receptor alpha7,nudE,Octopamine receptor in mushroom bodies,Odorant receptor 82a,plum,Resistant to dieldrin,Shaker cognate w,Tissue inhibitor …
Over-expressed 48 AEL	1301	Cellular component	extracellular region	GO:0005576	0.00017	1.5	114	783	83.05	0.146	0.088	Actbeta,Adgf-D,ALiX,amn,Ance-4,AttA,AttB,AttC,AttD,beat-Ia,Burs,CCHa1,CecA1,CecA2,CG10031,CG10433,CG10730,CG10918,CG11131,CG11852,CG12896,CG13837,CG14457,CG1552,CG16995,CG17843,CG18067,CG18135,CG2650,CG32206,CG33985,CG34402,CG4982,CG5267,CG5867,CG7142,CG8093,CG9449,CheB42c,cmpy,Cpr100A,Cpr49Af,Cpr67B,Cpr76Bb,Cpr97Eb,dlp,dpr16,DptB,Dro,Drs,edin,Fs,GNBP2,Gpb5,hig,Idgf1,Ilp3,IM1,IM18,ImpL2,IMPPP,kel…	Activin-beta,Adenosine deaminase-related growth factor D,ALG-2 interacting protein X,amnesiac,Ance-4,Attacin-A,Attacin-B,Attacin-C,Attacin-D,beaten path Ia,Bursicon,CCHamide-1,Cecropin A1,Cecropin A2,Chemosensory protein B 42c,crimpy,Cuticular protein 100A,Cuticular protein 49Af,Cuticular protein 67B,Cuticular protein 76Bb,Cuticular protein 97Eb,dally-like,defective proboscis extension response 1…
Over-expressed 48 AEL	1301	Cellular component	plasma membrane bounded cell projection part	GO:0120038	0.00018	2.36	28	134	13.76	0.209	0.022	5-HT1A,Alk,ana1,Arr2,Atg8a,BBS4,Burs,Cbp53E,Cc2d2a,CCKLR-17D1,Cep135,cep290,CG1126,CG15666,CG15923,CG17387,CG32206,CG3339,CG34402,CG5142,CG9492,CLIP-190,cmpy,Dhc62B,Dhc93AB,Dhc98D,Dop1R1,dpr11,dpr12,dpr18,dpr2,dpr20,dpr4,dpr5,dpr6,drl,dysc,erm,fry,futsch,gogo,Gr33a,Gr39a,Gr94a,hdc,inaC,Ir25a,Ir76b,kek6,mlt,nAChRalpha7,ninaC,nudE,Oamb,Or82a,Oseg2,PIP5K59B,plum,Rab3-GEF,rdgB,Rdl,rempA,rtp,Shaw,Timp…	5-hydroxytryptamine (serotonin) receptor 1A,Anaplastic lymphoma kinase,anastral spindle 1,Arrestin 2,Autophagy-related 8a,Bardet-Biedl syndrome 4,Bursicon,Calbindin 53E,Centrosomal protein 135kDa,cep290,Cholecystokinin-like receptor at 17D1,Coiled-coil and C2 domain containing 2A,crimpy,Cytoplasmic linker protein 190,defective proboscis extension response 11,defective proboscis extension response…
Over-expressed 48 AEL	1301	Cellular component	axon	GO:0030424	0.00019	2.1	36	184	19.52	0.196	0.028	Alk,Atg8a,bdl,Burs,Cbp53E,CCKLR-17D1,CG44153,CLIP-190,cmpy,Dab,drl,Dscam2,Dscam3,Dscam4,erm,fry,futsch,gogo,Gr33a,Gr39a,Gr94a,hdc,ImpL2,InR,kek6,nudE,plum,Ptp99A,Rab3-GEF,rad,Rdl,Shaw,Syt7,Trim9,unc-104,unc-13	Anaplastic lymphoma kinase,Autophagy-related 8a,borderless,Bursicon,Calbindin 53E,Cholecystokinin-like receptor at 17D1,crimpy,Cytoplasmic linker protein 190,derailed,Disabled,Down syndrome cell adhesion molecule 2,Down syndrome cell adhesion molecule 3,Down syndrome cell adhesion molecule 4,earmuff,Ecdysone-inducible gene L2,furry,futsch,golden goal,Gustatory receptor 33a,Gustatory receptor 39a,…
Over-expressed 48 AEL	1301	Cellular component	somatodendritic compartment	GO:0036477	0.00019	2.2	32	157	16.65	0.204	0.025	5-HT1A,Cbp53E,CCKLR-17D1,Dop1R1,drl,erm,fry,futsch,Gr33a,Gr39a,Gr94a,hdc,hig,Ir25a,Ir76b,nAChRalpha7,nudE,Oamb,Or82a,PICK1,plum,Rab18,Rab3-GEF,Rab39,RabX4,rad,Rdl,Shaw,SK,Timp,trpl,unc-104	5-hydroxytryptamine (serotonin) receptor 1A,Calbindin 53E,Cholecystokinin-like receptor at 17D1,derailed,Dopamine 1-like receptor 1,earmuff,furry,futsch,Gustatory receptor 33a,Gustatory receptor 39a,Gustatory receptor 94a,headcase,hikaru genki,Ionotropic receptor 25a,Ionotropic receptor 76b,nicotinic Acetylcholine Receptor alpha7,nudE,Octopamine receptor in mushroom bodies,Odorant receptor 82a,pl…
Over-expressed 48 AEL	1301	Cellular component	extracellular space	GO:0005615	0.00025	1.68	67	415	44.02	0.161	0.051	Actbeta,Adgf-D,amn,Ance-4,AttA,AttB,AttC,AttD,Burs,CCHa1,CecA1,CecA2,CG10031,CG10433,CG10730,CG10918,CG11131,CG11852,CG12896,CG14457,CG1552,CG16995,CG17843,CG18067,CG18135,CG2650,CG32206,CG34402,CG4982,CG5267,CG5867,CG6421,CG7142,CG8093,CG9449,CheB42c,DptB,Drs,edin,Gpb5,Ilp3,ImpL2,IMPPP,lectin-46Ca,lectin-46Cb,Listericin,NLaz,obst-G,obst-H,Or82a,Pde1c,PGRP-LF,PGRP-SB1,PGRP-SC1a,PGRP-SC1b,Proc,pyr…	Activin-beta,Adenosine deaminase-related growth factor D,amnesiac,Ance-4,Attacin-A,Attacin-B,Attacin-C,Attacin-D,Bursicon,CCHamide-1,Cecropin A1,Cecropin A2,Chemosensory protein B 42c,Diptericin B,Drosomycin,Ecdysone-inducible gene L2,elevated during infection,Glycoprotein hormone beta 5,Immune induced molecule prepropeptide,Insulin-like peptide 3,lectin-46Ca,lectin-46Cb,listericin,Neural Lazaril…
Over-expressed 48 AEL	1301	Cellular component	neuron projection	GO:0043005	0.00051	3.49	13	46	4.71	0.283	0.01	5-HT1A,Alk,Atg8a,bdl,Burs,Cbp53E,CCKLR-17D1,CG10702,CG32206,CG34402,CG44153,ChAT,CLIP-190,cmpy,Dab,Dop1R1,dpr11,dpr12,dpr18,dpr2,dpr20,dpr4,dpr5,dpr6,drl,Dscam2,Dscam3,Dscam4,dysc,erm,fry,futsch,GluClalpha,gogo,Gr33a,Gr39a,Gr94a,Grd,hdc,ImpL2,InR,Ir25a,Ir76b,kek6,Kif3C,nAChRalpha2,nAChRalpha3,nAChRalpha5,nAChRalpha6,nAChRalpha7,nudE,Oamb,Or82a,orb,PICK1,plum,Ptp99A,Rab3-GEF,rad,Rdl,Shaw,SK,Syt7,T…	5-hydroxytryptamine (serotonin) receptor 1A,Anaplastic lymphoma kinase,Autophagy-related 8a,borderless,Bursicon,Calbindin 53E,Cholecystokinin-like receptor at 17D1,Choline acetyltransferase,crimpy,Cytoplasmic linker protein 190,defective proboscis extension response 11,defective proboscis extension response 12,defective proboscis extension response 18,defective proboscis extension response 2,defe…
Over-expressed 48 AEL	1301	Cellular component	axoneme part	GO:0044447	0.00074	8.48	6	12	1.27	0.5	0.005	CG3339,CG5142,CG9492,Dhc62B,Dhc93AB,Dhc98D	Dynein heavy chain at 62B,Dynein heavy chain at 89D,Dynein heavy chain at 93AB,uncharacterized protein
Over-expressed 48 AEL	1301	Cellular component	ciliary part	GO:0044441	0.0009	4.55	9	26	2.73	0.346	0.007	ana1,BBS4,Cc2d2a,Cep135,cep290,CG1126,CG15666,CG15923,CG17387,CG3339,CG5142,CG9492,Dhc62B,Dhc93AB,Dhc98D,dysc,mlt,Oseg2,rempA	anastral spindle 1,Bardet-Biedl syndrome 4,Centrosomal protein 135kDa,cep290,Coiled-coil and C2 domain containing 2A,Dynein heavy chain at 62B,Dynein heavy chain at 89D,Dynein heavy chain at 93AB,dyschronic,mulet,Outer segment 2,reduced mechanoreceptor potential A,uncharacterized protein
Under-expressed 48 AEL	1726	Biological process	proteolysis	GO:0006508	1.6e-20	2.39	201	703	108.96	0.286	0.116	alien,Ance,Ance-2,CalpC,CG10602,CG10764,CG11911,CG11912,CG12256,CG1304,CG13744,CG15253,CG15254,CG15255,CG15485,CG1632,CG17134,CG17337,CG17571,CG17633,CG18477,CG2915,CG30025,CG30031,CG30371,CG30382,CG31267,CG31269,CG31780,CG31954,CG32376,CG32379,CG33459,CG3355,CG4017,CG42264,CG43124,CG43125,CG43366,CG4678,CG4847,CG5188,CG5355,CG6337,CG6347,CG6696,CG7025,CG7631,CG8170,CG8172,CG8213,CG8299,CG8320,CG…	alien,Ance-2,Angiotensin converting enzyme,Calpain C,Derlin-1,gammaTrypsin,Heat shock 70-kDa protein cognate 3,Jonah 25Bi,Jonah 25Bii,Jonah 25Biii,Jonah 44E,kelch like family member 10,lambdaTry,lethal (2) k05911,Nardilysin,Nedd8,Notopleural,pomp,prenyl protease type I,Proteasome alpha4 subunit,Proteasome alpha5 subunit,Proteasome alpha6 subunit,Proteasome alpha7 subunit,Proteasome beta4 subunit,…
Under-expressed 48 AEL	1726	Biological process	chitin-based cuticle development	GO:0040003	1.9e-20	4.96	73	157	24.33	0.465	0.042	amd,Ccp84Aa,Ccp84Ab,Ccp84Ac,Ccp84Ad,Ccp84Af,CG34461,CG34462,Cht5,Cht9,ck,Cpr12A,Cpr23B,Cpr30F,Cpr35B,Cpr47Eb,Cpr47Ec,Cpr47Ed,Cpr49Ac,Cpr49Ad,Cpr49Ag,Cpr49Ah,Cpr51A,Cpr5C,Cpr60D,Cpr64Ab,Cpr64Ad,Cpr65Ea,Cpr65Eb,Cpr65Ec,Cpr66Cb,Cpr66D,Cpr67Fa2,Cpr67Fb,Cpr78Cb,CrebA,dpy,dsx-c73A,exp,gammaCOP,Gld,knk,Lcp2,Lcp4,Lcp65Ab1,Lcp65Ad,Lcp65Af,Lcp65Ag1,mgl,obst-A,Pcp,rtv,Sec13,Sec23,Sec24CD,SrpRbeta,Tb,TwdlB,T…	alpha methyl dopa-resistant,Ccp84Aa,Ccp84Ab,Ccp84Ac,Ccp84Ad,Ccp84Af,Chitinase 5,Chitinase 9,Coat Protein (coatomer) gamma,crinkled,Cuticular protein 12A,Cuticular protein 23B,Cuticular protein 30F,Cuticular protein 35B,Cuticular protein 47Eb,Cuticular protein 47Ec,Cuticular protein 47Ed,Cuticular protein 49Ac,Cuticular protein 49Ad,Cuticular protein 49Ag,Cuticular protein 49Ah,Cuticular protein 5…
Under-expressed 48 AEL	1726	Biological process	DNA replication	GO:0006260	1.5e-11	4.2	45	105	16.27	0.429	0.026	Caf1-180,CDC45L,Cdc6,Cdk1,CG10336,CG11788,CG13690,CG2990,CG3430,Ctf4,CycE,DNA-ligI,DNApol-alpha180,DNApol-alpha50,DNApol-alpha60,DNApol-alpha73,DNApol-epsilon255,DNApol-epsilon58,dpa,dup,Fen1,geminin,hd,Mcm10,Mcm2,Mcm3,Mcm5,Mcm6,Mcm7,mus308,Orc1,Orc2,Orc3,Orc5,Orc6,PCNA,Pif1,Psf1,RecQ4,RfC38,Rif1,RnrL,RPA2,timeout,WRNexo	CDC45L,Cdc6,Chromatin assembly factor 1, p180 subunit,Chromosome transmission fidelity 4,Cyclin E,Cyclin-dependent kinase 1,disc proliferation abnormal,DNA ligase I,DNA polymerase alpha 180kD,DNA polymerase alpha 50kD,DNA polymerase alpha 60kD,DNA polymerase alpha 73kD,DNA polymerase epsilon 255kD subunit,DNA polymerase epsilon 58kD subunit,double parked,Flap endonuclease 1,geminin,humpty dumpty,…
Under-expressed 48 AEL	1726	Biological process	DNA replication initiation	GO:0006270	3.7e-11	19.88	18	23	3.56	0.783	0.01	CDC45L,Cdc6,Cdk1,DNApol-alpha180,DNApol-alpha73,dpa,Mcm10,Mcm2,Mcm3,Mcm5,Mcm6,Mcm7,Orc1,Orc2,Orc3,Orc5,Orc6,Rif1	CDC45L,Cdc6,Cyclin-dependent kinase 1,disc proliferation abnormal,DNA polymerase alpha 180kD,DNA polymerase alpha 73kD,Minichromosome maintenance 10,Minichromosome maintenance 2,Minichromosome maintenance 3,Minichromosome maintenance 5,Minichromosome maintenance 6,Minichromosome maintenance 7,Origin recognition complex subunit 1,Origin recognition complex subunit 2,Origin recognition complex subu…
Under-expressed 48 AEL	1726	Biological process	establishment of protein localization to endoplasmic reticulum	GO:0072599	1.9e-10	18.76	17	22	3.41	0.773	0.01	CG5885,Gtp-bp,Sec61alpha,Sec61beta,Sec63,Sgt,Spase12,Spase22-23,Spase25,Srp14,Srp19,Srp54k,Srp68,Srp72,Srp9,TRAM,Trp1	GTP-binding protein,Sec61 alpha subunit,Sec61 beta subunit,Secretory 63,Signal recognition particle protein 14,Signal recognition particle protein 19,Signal recognition particle protein 54k,Signal recognition particle protein 68,Signal recognition particle protein 72,Signal recognition particle protein 9,small glutamine-rich tetratricopeptide containing protein,Spase 12-subunit,Spase 22/23-subuni…
Under-expressed 48 AEL	1726	Biological process	proteasomal ubiquitin-independent protein catabolic process	GO:0010499	2.2e-09	35.78	13	15	2.32	0.867	0.008	Prosalpha2,Prosalpha3,Prosalpha4,Prosalpha5,Prosalpha6,Prosalpha7,Prosbeta1,Prosbeta2,Prosbeta3,Prosbeta4,Prosbeta5,Prosbeta6,Prosbeta7	Proteasome alpha2 subunit,Proteasome alpha3 subunit,Proteasome alpha4 subunit,Proteasome alpha5 subunit,Proteasome alpha6 subunit,Proteasome alpha7 subunit,Proteasome beta1 subunit,Proteasome beta2 subunit,Proteasome beta3 subunit,Proteasome beta4 subunit,Proteasome beta5 subunit,Proteasome beta6 subunit,Proteasome beta7 subunit
Under-expressed 48 AEL	1726	Biological process	protein folding	GO:0006457	3.4e-07	3.97	27	65	10.01	0.415	0.016	boca,Calr,CCT1,CCT2,CCT3,CCT5,CCT7,CCT8,CG11267,CG16817,CG17266,CG2852,CG3678,CG7872,CNPYb,Cnx99A,Cyp1,Cypl,EMC1,EMC3,ERp60,FK506-bp2,FKBP59,Gp93,HIP,HIP-R,Hsc70-3,Hsp67Ba,Hsp68,Hsp70Ba,l(2)efl,Nrd1,nudC,P58IPK,Pdi,Pfdn5,Pfdn6,sel,Sgt,shv,Torsin,wbl	boca,Calnexin 99A,Calreticulin,Canopy b,Chaperonin containing TCP1 subunit 1,Chaperonin containing TCP1 subunit 2,Chaperonin containing TCP1 subunit 3,Chaperonin containing TCP1 subunit 5,Chaperonin containing TCP1 subunit 7,Chaperonin containing TCP1 subunit 8,Cyclophilin 1,Cyclophilin-like,ER Membrane protein Complex 1,ER Membrane protein Complex 3,ERp60,FK506-binding protein 2,FK506-binding pr…
Under-expressed 48 AEL	1726	Biological process	ER to Golgi vesicle-mediated transport	GO:0006888	4.2e-07	3.78	28	69	10.69	0.406	0.016	alphaCOP,Arl1,bai,beta'COP,betaCOP,boca,CG32069,CG4293,CG5484,CG5510,CG7011,CG9175,CHOp24,deltaCOP,eca,epsilonCOP,ergic53,gammaCOP,KdelR,loj,Membrin,p115,p24-1,p24-2,Sec13,Sec22,Sec23,Sec24CD	ADP ribosylation factor-like 1,baiser,boca,CHOp24,Coat Protein (coatomer) alpha,Coat Protein (coatomer) beta,Coat Protein (coatomer) beta',Coat Protein (coatomer) delta,Coat Protein (coatomer) epsilon,Coat Protein (coatomer) gamma,eclair,ergic53,KDEL receptor,logjam,membrin,p115,p24-related-1,p24-related-2,Secretory 13,Secretory 22,Secretory 23,Secretory 24CD,uncharacterized protein
Under-expressed 48 AEL	1726	Biological process	eggshell chorion gene amplification	GO:0007307	5.2e-05	6.71	11	20	3.1	0.55	0.006	Caf1-55,CycE,dup,geminin,hd,Mcm6,mip40,Orc2,PCNA,pic,RecQ4	Chromatin assembly factor 1, p55 subunit,Cyclin E,double parked,geminin,humpty dumpty,Minichromosome maintenance 6,Myb-interacting protein 40,Origin recognition complex subunit 2,piccolo,Proliferating cell nuclear antigen,RecQ4 helicase
Under-expressed 48 AEL	1726	Biological process	body morphogenesis	GO:0010171	8e-05	5.49	12	24	3.72	0.5	0.007	Tb,TwdlB,Twdlbeta,TwdlD,TwdlG,TwdlM,TwdlR,TwdlS,TwdlT,TwdlW,TwdlX,TwdlY	Tubby,TweedleB,Tweedlebeta,TweedleD,TweedleG,TweedleM,TweedleR,TweedleS,TweedleT,TweedleW,TweedleX,TweedleY
Under-expressed 48 AEL	1726	Biological process	SRP-dependent cotranslational protein targeting to membrane	GO:0006614	8.2e-05	33	6	7	1.08	0.857	0.003	CG5885,Gtp-bp,Sec61alpha,Sec61beta,Sec63,Srp14,Srp19,Srp54k,Srp68,Srp72,Srp9,TRAM	GTP-binding protein,Sec61 alpha subunit,Sec61 beta subunit,Secretory 63,Signal recognition particle protein 14,Signal recognition particle protein 19,Signal recognition particle protein 54k,Signal recognition particle protein 68,Signal recognition particle protein 72,Signal recognition particle protein 9,TRAM,uncharacterized protein
Under-expressed 48 AEL	1726	Biological process	organonitrogen compound metabolic process	GO:1901564	8.2e-05	1.27	477	2693	417.41	0.177	0.276	AIF,Alg10,alpha-PheRS,ArgRS,Atox1,Btnd,CalpC,CG11911,CG11912,CG12256,CG1304,CG15343,CG1632,CG1885,CG30008,CG30025,CG30031,CG30291,CG30382,CG30496,CG31267,CG31269,CG31780,CG31917,CG31954,CG32276,CG32284,CG32376,CG32379,CG33303,CG33459,CG3355,CG3964,CG4020,CG42264,CG43124,CG43125,CG4678,CG4829,CG5321,CG5613,CG6696,CG7860,CG7889,CG8239,CG8945,CG9672,Cht10,Cyp1,Der-1,dod,ds,Hsc70-3,Jon25Bi,Jon25Bii,J…	Alpha 3 glucosyltransferase,Antioxidant 1 copper chaperone,Apoptosis inducing factor,Arginyl-tRNA synthetase,Biotinidase,Calpain C,Catalytic subunit 3A of the oligosaccharyltransferase complex,Chitinase 10,Cyclophilin 1,dachsous,Derlin-1,dodo,Heat shock 70-kDa protein cognate 3,Jonah 25Bi,Jonah 25Bii,Jonah 25Biii,kelch like family member 10,lesswright,mitochondrial ribosomal protein L10,mitochond…
Under-expressed 48 AEL	1726	Biological process	SRP-dependent cotranslational protein targeting to membrane, translocation	GO:0006616	8.3e-05	32.85	6	7	1.08	0.857	0.003	Sec61alpha,Sec61beta,Srp19,Srp72,Srp9,TRAM	Sec61 alpha subunit,Sec61 beta subunit,Signal recognition particle protein 19,Signal recognition particle protein 72,Signal recognition particle protein 9,TRAM
Under-expressed 48 AEL	1726	Biological process	positive regulation of RNA polymerase II transcriptional preinitiation complex assembly	GO:0045899	8.3e-05	32.85	6	7	1.08	0.857	0.003	Rpt1,Rpt3,Rpt3R,Rpt4,Rpt5,Rpt6	Regulatory particle triple-A ATPase 1,Regulatory particle triple-A ATPase 3,Regulatory particle triple-A ATPase 3-related,Regulatory particle triple-A ATPase 4,Regulatory particle triple-A ATPase 5,Regulatory particle triple-A ATPase 6
Under-expressed 48 AEL	1726	Biological process	macromolecule glycosylation	GO:0043413	0.0001	2.62	27	84	13.02	0.321	0.016	Alg10,CG10166,CG11149,CG32276,CG33303,CG33774,CG33977,CG34452,CG3792,CG7840,CG8708,CG9669,Dad1,meigo,O-fut1,Ost48,OstDelta,Ostgamma,Pabp2,pgant3,rt,rumi,Stt3A,Stt3B,tw,Ugt,wol	Alpha 3 glucosyltransferase,Catalytic subunit 3A of the oligosaccharyltransferase complex,Catalytic subunit 3B of the oligosaccharyltransferase complex,Defender against apoptotic cell death 1,medial glomeruli,O-fucosyltransferase 1,Oligosaccharide transferase Delta subunit,Oligosaccharide transferase gamma subunit,Oligosaccharyltransferase 48kD subunit,Pabp2,polypeptide GalNAc transferase 3,rotat…
Under-expressed 48 AEL	1726	Biological process	Golgi organization	GO:0007030	0.00017	2.56	26	82	12.71	0.317	0.015	Arl1,bai,CG10738,CG13049,CG13284,CG16817,CG5510,CG7456,CHOp24,eca,ergic53,GPHR,Grasp65,loj,mEFTu1,Ost48,p115,p24-1,p24-2,rumi,Sec23,Sec24CD,stg,Tango2,TER94,wol	ADP ribosylation factor-like 1,baiser,CHOp24,eclair,ergic53,Golgi pH Regulator,Grasp65,logjam,mitochondrial translation elongation factor Tu 1,Oligosaccharyltransferase 48kD subunit,p115,p24-related-1,p24-related-2,rumi,Secretory 23,Secretory 24CD,string,TER94,Transport and Golgi organization 2,uncharacterized protein,wollknaeuel
Under-expressed 48 AEL	1726	Biological process	glycoprotein biosynthetic process	GO:0009101	0.00017	2.37	30	100	15.5	0.3	0.017	Alg10,beta4GalT7,CG10166,CG11149,CG32276,CG33303,CG33774,CG33977,CG34452,CG3792,CG7840,CG8708,CG9669,Dad1,meigo,O-fut1,Ost48,OstDelta,Ostgamma,Pabp2,Papst2,pgant3,rt,rumi,sll,Stt3A,Stt3B,tw,Ugt,wol	Alpha 3 glucosyltransferase,beta-4-galactosyltransferase 7,Catalytic subunit 3A of the oligosaccharyltransferase complex,Catalytic subunit 3B of the oligosaccharyltransferase complex,Defender against apoptotic cell death 1,medial glomeruli,O-fucosyltransferase 1,Oligosaccharide transferase Delta subunit,Oligosaccharide transferase gamma subunit,Oligosaccharyltransferase 48kD subunit,Pabp2,PAPS tr…
Under-expressed 48 AEL	1726	Biological process	DNA strand elongation involved in DNA replication	GO:0006271	0.0002	7.05	9	16	2.48	0.562	0.005	CG13690,CG2990,DNA-ligI,DNApol-alpha180,DNApol-epsilon255,Fen1,PCNA,Psf1,RfC38	DNA ligase I,DNA polymerase alpha 180kD,DNA polymerase epsilon 255kD subunit,Flap endonuclease 1,Proliferating cell nuclear antigen,Psf1,Replication factor C 38kD subunit,uncharacterized protein
Under-expressed 48 AEL	1726	Biological process	protein targeting	GO:0006605	0.00022	2.42	28	92	14.26	0.304	0.016	boca,CG14270,CG34132,CG5885,CG8860,Gtp-bp,Membrin,Sec61alpha,Sec61beta,Sec61gamma,Sec63,Sgt,Spase12,Spase22-23,Spase25,Srp14,Srp19,Srp54k,Srp68,Srp72,Srp9,Tim8,Tim9a,Tim9b,Tom70,TRAM,Trp1,ttm50	boca,GTP-binding protein,membrin,Sec61 alpha subunit,Sec61 beta subunit,Sec61 gamma subunit,Secretory 63,Signal recognition particle protein 14,Signal recognition particle protein 19,Signal recognition particle protein 54k,Signal recognition particle protein 68,Signal recognition particle protein 72,Signal recognition particle protein 9,small glutamine-rich tetratricopeptide containing protein,Sp…
Under-expressed 48 AEL	1726	Biological process	proteasome-mediated ubiquitin-dependent protein catabolic process	GO:0043161	0.00022	1.93	46	178	27.59	0.258	0.027	CG30382,Der-1,Fbxl7,Hsc70-3,ida,pic,Plap,Pomp,Prosalpha2,Prosalpha3,Prosalpha4,Prosalpha5,Prosalpha6,Prosalpha7,Prosbeta1,Prosbeta2,Prosbeta3,Prosbeta4,Prosbeta5,Prosbeta6,Prosbeta7,Rpn1,Rpn10,Rpn11,Rpn12,Rpn2,Rpn3,Rpn5,Rpn7,Rpn8,Rpn9,Rpt1,Rpt2,Rpt3,Rpt3R,Rpt4,Rpt5,Rpt6,Sec13,Sem1,Sgt,sip3,Skp2,TER94,Uch-L5,Usp5	Derlin-1,F-box and leucine-rich repeat protein 7,Heat shock 70-kDa protein cognate 3,imaginal discs arrested,Phospholipase A2 activator protein,piccolo,pomp,Proteasome alpha2 subunit,Proteasome alpha3 subunit,Proteasome alpha4 subunit,Proteasome alpha5 subunit,Proteasome alpha6 subunit,Proteasome alpha7 subunit,Proteasome beta1 subunit,Proteasome beta2 subunit,Proteasome beta3 subunit,Proteasome …
Under-expressed 48 AEL	1726	Biological process	DNA biosynthetic process	GO:0071897	0.00031	3.38	16	42	6.51	0.381	0.009	Caf1-55,CDC45L,CycE,DNA-ligI,DNApol-epsilon58,dup,geminin,hd,Mcm6,mip40,Orc1,Orc2,PCNA,pic,RecQ4,RPA2	CDC45L,Chromatin assembly factor 1, p55 subunit,Cyclin E,DNA ligase I,DNA polymerase epsilon 58kD subunit,double parked,geminin,humpty dumpty,Minichromosome maintenance 6,Myb-interacting protein 40,Origin recognition complex subunit 1,Origin recognition complex subunit 2,piccolo,Proliferating cell nuclear antigen,RecQ4 helicase,Replication protein A2
Under-expressed 48 AEL	1726	Biological process	protein N-linked glycosylation	GO:0006487	0.00037	3.97	13	31	4.8	0.419	0.008	Alg10,CG33303,CG33774,CG7840,CG9669,Dad1,meigo,Ost48,OstDelta,Ostgamma,Stt3B,Ugt,wol	Alpha 3 glucosyltransferase,Catalytic subunit 3B of the oligosaccharyltransferase complex,Defender against apoptotic cell death 1,medial glomeruli,Oligosaccharide transferase Delta subunit,Oligosaccharide transferase gamma subunit,Oligosaccharyltransferase 48kD subunit,UDP-glucose-glycoprotein glucosyltransferase,uncharacterized protein,wollknaeuel
Under-expressed 48 AEL	1726	Biological process	wax biosynthetic process	GO:0010025	0.00039	9.59	7	11	1.7	0.636	0.004	CG30427,CG4020,CG5065,CG8303,CG8306,FarO,wat	Fatty acyl-CoA reductase in oenocytes,uncharacterized protein,waterproof
Under-expressed 48 AEL	1726	Biological process	posttranslational protein targeting to endoplasmic reticulum membrane	GO:0006620	0.00046	27.36	5	6	0.93	0.833	0.003	Sec61alpha,Sec61beta,Sec63,Sgt,Trp1	Sec61 alpha subunit,Sec61 beta subunit,Secretory 63,small glutamine-rich tetratricopeptide containing protein,Translocation protein 1
Under-expressed 48 AEL	1726	Biological process	chaperone-mediated protein folding	GO:0061077	0.00057	3.3	15	40	6.2	0.375	0.009	CG11267,CNPYb,FK506-bp2,FKBP59,HIP,HIP-R,Hsc70-3,Hsp67Ba,Hsp68,Hsp70Ba,l(2)efl,Nrd1,sel,Sgt,Torsin	Canopy b,FK506-binding protein 2,FK506-binding protein FKBP59,Heat shock 70-kDa protein cognate 3,Heat shock gene 67Ba,Heat shock protein 68,Heat-shock-protein-70Ba,Hsc/Hsp70-interacting protein,Hsc/Hsp70-interacting protein related,lethal (2) essential for life,Nardilysin,seele,small glutamine-rich tetratricopeptide containing protein,torsin,uncharacterized protein
Under-expressed 48 AEL	1726	Biological process	regulation of post-mating oviposition	GO:0048042	0.00075	10.95	6	9	1.39	0.667	0.003	bai,CHOp24,eca,loj,p24-1,p24-2	baiser,CHOp24,eclair,logjam,p24-related-1,p24-related-2
Under-expressed 48 AEL	1726	Biological process	acyl-CoA metabolic process	GO:0006637	0.00077	3.57	13	33	5.11	0.394	0.008	ATPCL,CG10268,CG30427,CG33671,CG4020,CG5065,CG8239,CG8303,CG8306,FarO,scu,Sucb,wat	ATP citrate lyase,Fatty acyl-CoA reductase in oenocytes,scully,sucb,uncharacterized protein,waterproof
Under-expressed 48 AEL	1726	Biological process	long-chain fatty-acyl-CoA metabolic process	GO:0035336	0.00082	7.67	7	12	1.86	0.583	0.004	CG30427,CG4020,CG5065,CG8303,CG8306,FarO,wat	Fatty acyl-CoA reductase in oenocytes,uncharacterized protein,waterproof
Under-expressed 48 AEL	1726	Biological process	carbohydrate derivative metabolic process	GO:1901135	0.00097	1.43	112	550	85.25	0.204	0.065	Adgf-C,Adk3,AIF,Alg10,ATPCL,awd,beta4GalT7,CG10166,CG10268,CG10474,CG10738,CG11149,CG11164,CG12009,CG13675,CG13676,CG13806,CG14291,CG14304,CG14880,CG17145,CG30427,CG32276,CG32284,CG33303,CG33671,CG33774,CG33977,CG34282,CG3788,CG3792,CG4020,CG4302,CG5065,CG5167,CG5613,CG7840,CG8239,CG8303,CG8306,CG8708,CG9669,Cht10,Cht5,Cht9,Dad1,dnk,dUTPase,exp,GCS2beta,Gmer,Gpdh,Gyc89Da,Hexo1,Hml,LManV,meigo,Mes…	abnormal wing discs,Adenosine deaminase-related growth factor C,Adenylate kinase 3,Alpha 3 glucosyltransferase,Apoptosis inducing factor,ATP citrate lyase,beta-4-galactosyltransferase 7,Catalytic subunit 3A of the oligosaccharyltransferase complex,Catalytic subunit 3B of the oligosaccharyltransferase complex,Chitinase 10,Chitinase 5,Chitinase 9,Defender against apoptotic cell death 1,deoxyribonuc…
Under-expressed 48 AEL	1726	Molecular function	peptidase activity, acting on L-amino acid peptides	GO:0070011	5.7e-21	3.71	102	261	40.57	0.391	0.059	Ance,Ance-2,Ance-5,CalpC,CG10472,CG10602,CG10764,CG11911,CG11912,CG12256,CG1304,CG13744,CG14820,CG15253,CG15254,CG15255,CG15485,CG16998,CG17134,CG17337,CG17571,CG17633,CG2915,CG30025,CG30031,CG30371,CG30382,CG31267,CG31269,CG31780,CG31954,CG32374,CG32376,CG32379,CG3344,CG33459,CG33465,CG3355,CG3502,CG4017,CG42264,CG43124,CG43125,CG4386,CG4678,CG4829,CG4847,CG5131,CG5188,CG5355,CG6337,CG6347,CG669…	Ance-2,Ance-5,Angiotensin converting enzyme,Calpain C,gammaTrypsin,Jonah 25Bi,Jonah 25Bii,Jonah 25Biii,Jonah 44E,Jonah 65Ai,Jonah 65Aii,Jonah 65Aiii,Jonah 65Aiv,Jonah 66Ci,Jonah 66Cii,lambdaTry,lethal (2) k05911,Nardilysin,Notopleural,prenyl protease type I,Proteasome alpha3 subunit,Proteasome alpha4 subunit,Proteasome alpha5 subunit,Proteasome alpha6 subunit,Proteasome alpha7 subunit,Proteasome …
Under-expressed 48 AEL	1726	Molecular function	serine-type endopeptidase activity	GO:0004252	4.1e-18	4.52	70	156	24.67	0.449	0.041	CG10472,CG10764,CG11836,CG11842,CG11843,CG11911,CG11912,CG12256,CG1304,CG13744,CG16749,CG16998,CG17475,CG17477,CG17571,CG30025,CG30031,CG30371,CG31266,CG31267,CG31269,CG31780,CG31954,CG32374,CG32376,CG33459,CG33465,CG3355,CG34437,CG34458,CG4053,CG43124,CG43125,CG4386,CG4613,CG4914,CG5255,CG5355,CG7432,CG8170,CG8172,CG8213,CG8299,CG8586,CG8738,deltaTry,ea,epsilonTry,gammaTry,Jon25Bi,Jon25Bii,Jon25…	deltaTrypsin,easter,epsilonTrypsin,gammaTrypsin,Jonah 25Bi,Jonah 25Bii,Jonah 25Biii,Jonah 44E,Jonah 65Ai,Jonah 65Aii,Jonah 65Aiii,Jonah 65Aiv,Jonah 66Ci,Jonah 66Cii,Jonah 74E,Jonah 99Cii,Jonah 99Ciii,Jonah 99Fii,lambdaTry,lethal (2) k05911,Notopleural,Serine protease 6,Stubble,thetaTrypsin,uncharacterized protein,yippee interacting protein 7
Under-expressed 48 AEL	1726	Molecular function	serine hydrolase activity	GO:0017171	5.8e-17	3.99	74	177	28	0.418	0.043	CG10472,CG10764,CG11836,CG11842,CG11843,CG11911,CG11912,CG12256,CG1304,CG13744,CG16749,CG16998,CG17475,CG17477,CG17571,CG30025,CG30031,CG30371,CG31266,CG31267,CG31269,CG31780,CG31954,CG32374,CG32376,CG3344,CG33459,CG33465,CG3355,CG34437,CG34458,CG3734,CG4053,CG43124,CG43125,CG4386,CG4613,CG4914,CG5255,CG5355,CG7432,CG8170,CG8172,CG8213,CG8299,CG8586,CG8738,CG9953,deltaTry,ea,epsilonTry,gammaTry,J…	deltaTrypsin,easter,epsilonTrypsin,gammaTrypsin,Jonah 25Bi,Jonah 25Bii,Jonah 25Biii,Jonah 44E,Jonah 65Ai,Jonah 65Aii,Jonah 65Aiii,Jonah 65Aiv,Jonah 66Ci,Jonah 66Cii,Jonah 74E,Jonah 99Cii,Jonah 99Ciii,Jonah 99Fii,lambdaTry,lethal (2) k05911,Notopleural,Serine protease 6,Stubble,thetaTrypsin,twisted bristles roughened eye,uncharacterized protein,yippee interacting protein 7
Under-expressed 48 AEL	1726	Molecular function	structural constituent of chitin-based larval cuticle	GO:0008010	4.5e-15	7.05	40	71	11.23	0.563	0.023	Ccp84Aa,Ccp84Ab,Ccp84Ac,Ccp84Ad,Ccp84Af,CG34461,CG34462,Cpr12A,Cpr23B,Cpr30F,Cpr35B,Cpr47Eb,Cpr47Ec,Cpr47Ed,Cpr49Ac,Cpr49Ad,Cpr49Ag,Cpr49Ah,Cpr51A,Cpr5C,Cpr60D,Cpr64Ab,Cpr64Ad,Cpr65Ea,Cpr65Eb,Cpr65Ec,Cpr66Cb,Cpr66D,Cpr67Fa2,Cpr67Fb,Cpr78Cb,Lcp2,Lcp4,Lcp65Ab1,Lcp65Ad,Lcp65Af,Lcp65Ag1,Pcp,TwdlD,TwdlH	Ccp84Aa,Ccp84Ab,Ccp84Ac,Ccp84Ad,Ccp84Af,Cuticular protein 12A,Cuticular protein 23B,Cuticular protein 30F,Cuticular protein 35B,Cuticular protein 47Eb,Cuticular protein 47Ec,Cuticular protein 47Ed,Cuticular protein 49Ac,Cuticular protein 49Ad,Cuticular protein 49Ag,Cuticular protein 49Ah,Cuticular protein 51A,Cuticular protein 5C,Cuticular protein 60D,Cuticular protein 64Ab,Cuticular protein 64Ad…
Under-expressed 48 AEL	1726	Molecular function	threonine-type endopeptidase activity	GO:0004298	5.1e-10	37.65	14	16	2.53	0.875	0.008	CG30382,Prosalpha2,Prosalpha3,Prosalpha4,Prosalpha5,Prosalpha6,Prosalpha7,Prosbeta1,Prosbeta2,Prosbeta3,Prosbeta4,Prosbeta5,Prosbeta6,Prosbeta7	Proteasome alpha2 subunit,Proteasome alpha3 subunit,Proteasome alpha4 subunit,Proteasome alpha5 subunit,Proteasome alpha6 subunit,Proteasome alpha7 subunit,Proteasome beta1 subunit,Proteasome beta2 subunit,Proteasome beta3 subunit,Proteasome beta4 subunit,Proteasome beta5 subunit,Proteasome beta6 subunit,Proteasome beta7 subunit,uncharacterized protein
Under-expressed 48 AEL	1726	Molecular function	structural constituent of chitin-based cuticle	GO:0005214	5e-08	9.83	16	25	3.87	0.64	0.009	Ccp84Aa,Ccp84Ab,Ccp84Ac,Ccp84Ad,Ccp84Af,CG34461,CG34462,Cpr12A,Cpr23B,Cpr30F,Cpr35B,Cpr47Eb,Cpr47Ec,Cpr47Ed,Cpr49Ac,Cpr49Ad,Cpr49Ag,Cpr49Ah,Cpr51A,Cpr5C,Cpr60D,Cpr64Ab,Cpr64Ad,Cpr65Ea,Cpr65Eb,Cpr65Ec,Cpr66Cb,Cpr66D,Cpr67Fa2,Cpr67Fb,Cpr78Cb,dsx-c73A,Lcp2,Lcp4,Lcp65Ab1,Lcp65Ad,Lcp65Af,Lcp65Ag1,m,Pcp,Tb,TwdlB,Twdlbeta,TwdlC,TwdlD,TwdlE,TwdlG,TwdlH,TwdlM,TwdlR,TwdlS,TwdlT,TwdlV,TwdlW,TwdlX,TwdlY	Ccp84Aa,Ccp84Ab,Ccp84Ac,Ccp84Ad,Ccp84Af,Cuticular protein 12A,Cuticular protein 23B,Cuticular protein 30F,Cuticular protein 35B,Cuticular protein 47Eb,Cuticular protein 47Ec,Cuticular protein 47Ed,Cuticular protein 49Ac,Cuticular protein 49Ad,Cuticular protein 49Ag,Cuticular protein 49Ah,Cuticular protein 51A,Cuticular protein 5C,Cuticular protein 60D,Cuticular protein 64Ab,Cuticular protein 64Ad…
Under-expressed 48 AEL	1726	Molecular function	DNA replication origin binding	GO:0003688	9e-08	53.63	10	11	1.74	0.909	0.006	CDC45L,Cdc6,DNApol-alpha180,Mcm10,Mcm5,Orc1,Orc2,Orc3,Orc5,Orc6	CDC45L,Cdc6,DNA polymerase alpha 180kD,Minichromosome maintenance 10,Minichromosome maintenance 5,Origin recognition complex subunit 1,Origin recognition complex subunit 2,Origin recognition complex subunit 3,Origin recognition complex subunit 5,Origin recognition complex subunit 6
Under-expressed 48 AEL	1726	Molecular function	structural molecule activity	GO:0005198	1.7e-07	1.88	106	418	66.11	0.254	0.061	Act42A,alphaCOP,alphaTub84B,alphaTub84D,betaCOP,betaTub56D,bonsai,Ccp84Aa,Ccp84Ab,Ccp84Ac,Ccp84Ad,Ccp84Af,CG10602,CG31268,CG8771,Clc,Cpr12A,Cpr23B,Cpr30F,Cpr35B,Cpr47Eb,Cpr47Ec,Cpr47Ed,Cpr49Ac,Cpr49Ad,Cpr49Ag,Cpr49Ah,Cpr51A,Cpr5C,Cpr60D,Cpr64Ab,Cpr64Ad,Cpr65Ea,Cpr65Eb,Cpr65Ec,Cpr66Cb,Cpr66D,Cpr67Fa2,Cpr67Fb,Cpr78Cb,d,dpy,dsx-c73A,epsilonCOP,gammaCOP,Lcp2,Lcp4,Lcp65Ad,Lcp65Ag1,mRpL10,mRpL11,mRpL12…	Actin 42A,alpha-Tubulin at 84B,alpha-Tubulin at 84D,beta-Tubulin at 56D,bonsai,Ccp84Aa,Ccp84Ab,Ccp84Ac,Ccp84Ad,Ccp84Af,Clathrin light chain,Coat Protein (coatomer) alpha,Coat Protein (coatomer) beta,Coat Protein (coatomer) epsilon,Coat Protein (coatomer) gamma,Cuticular protein 12A,Cuticular protein 23B,Cuticular protein 30F,Cuticular protein 35B,Cuticular protein 47Eb,Cuticular protein 47Ec,Cuti…
Under-expressed 48 AEL	1726	Molecular function	dolichyl-diphosphooligosaccharide-protein glycotransferase activity	GO:0004579	2.4e-06	Inf	7	7	1.11	1	0.004	CG33303,CG33774,Dad1,Ost48,OstDelta,Ostgamma,Stt3B	Catalytic subunit 3B of the oligosaccharyltransferase complex,Defender against apoptotic cell death 1,Oligosaccharide transferase Delta subunit,Oligosaccharide transferase gamma subunit,Oligosaccharyltransferase 48kD subunit,uncharacterized protein
Under-expressed 48 AEL	1726	Molecular function	exopeptidase activity	GO:0008238	8.3e-06	3.09	28	77	12.18	0.364	0.016	Ance,Ance-2,Ance-5,CG14820,CG17337,CG17633,CG2915,CG32379,CG32473,CG3344,CG3502,CG3734,CG4017,CG42264,CG4408,CG4678,CG4829,CG5188,CG5355,CG7025,CG7860,CG8560,CG8562,CG8945,CG9953,DppIII,grsm,SP1029	Ance-2,Ance-5,Angiotensin converting enzyme,Dipeptidyl aminopeptidase III,granny smith,SP1029,uncharacterized protein
Under-expressed 48 AEL	1726	Molecular function	alkaline phosphatase activity	GO:0004035	8.4e-06	16.07	9	12	1.9	0.75	0.005	Alp1,Alp4,CG10592,CG16771,CG3264,CG3292,CG5150,CG8105,phu	Alkaline phosphatase 1,Alkaline phosphatase 4,phurba tashi,uncharacterized protein
Under-expressed 48 AEL	1726	Molecular function	7S RNA binding	GO:0008312	1.6e-05	Inf	6	6	0.95	1	0.003	Srp14,Srp19,Srp54k,Srp68,Srp72,Srp9	Signal recognition particle protein 14,Signal recognition particle protein 19,Signal recognition particle protein 54k,Signal recognition particle protein 68,Signal recognition particle protein 72,Signal recognition particle protein 9
Under-expressed 48 AEL	1726	Molecular function	proteasome-activating ATPase activity	GO:0036402	1.7e-05	37.45	7	8	1.27	0.875	0.004	Rpt1,Rpt2,Rpt3,Rpt3R,Rpt4,Rpt5,Rpt6	Regulatory particle triple-A ATPase 1,Regulatory particle triple-A ATPase 2,Regulatory particle triple-A ATPase 3,Regulatory particle triple-A ATPase 3-related,Regulatory particle triple-A ATPase 4,Regulatory particle triple-A ATPase 5,Regulatory particle triple-A ATPase 6
Under-expressed 48 AEL	1726	Molecular function	metallocarboxypeptidase activity	GO:0004181	1.7e-05	7.15	12	21	3.32	0.571	0.007	CG14820,CG17633,CG2915,CG32379,CG4017,CG42264,CG4408,CG4678,CG7025,CG8560,CG8562,CG8945	uncharacterized protein
Under-expressed 48 AEL	1726	Molecular function	metallopeptidase activity	GO:0008237	2.1e-05	2.44	37	119	18.82	0.311	0.021	Ance,Ance-2,CG10602,CG14527,CG14820,CG15253,CG15254,CG15255,CG15485,CG17337,CG17633,CG2915,CG32379,CG32473,CG3502,CG4017,CG42264,CG4408,CG4678,CG5131,CG5188,CG5715,CG6696,CG6763,CG7025,CG7631,CG8550,CG8560,CG8562,CG8945,grsm,Nep2,Nrd1,Rpn11,SP1029,ste24a,stl	Ance-2,Angiotensin converting enzyme,granny smith,Nardilysin,Neprilysin 2,prenyl protease type I,Regulatory particle non-ATPase 11,SP1029,stall,uncharacterized protein
Under-expressed 48 AEL	1726	Molecular function	hydrolase activity	GO:0016787	3e-05	1.39	246	1292	196.93	0.19	0.143	alpha-PheRS,Btnd,CalpC,CDC45L,CG11164,CG11911,CG11912,CG12256,CG1304,CG13690,CG15743,CG17134,CG17633,CG18258,CG18641,CG1986,CG2990,CG30016,CG30025,CG30031,CG30382,CG31267,CG31269,CG31780,CG31954,CG32376,CG32379,CG32750,CG32751,CG33459,CG3355,CG4017,CG42237,CG42264,CG43124,CG43125,CG4678,CG4829,CG5177,CG5188,CG5355,CG5397,CG5613,CG6230,CG6696,CG6847,CG7025,CG7367,CG7860,CG8105,CG8945,CG9664,Cht10,…	Biotinidase,Calpain C,CDC45L,Chitinase 10,dachs,Deoxyuridine triphosphatase,Derlin-1,eukaryotic translation release factor 3,Fatty acid synthase 3,Heat shock 70-kDa protein cognate 3,Helicase at 25E,Jonah 25Bi,Jonah 25Bii,Jonah 25Biii,Juvenile hormone epoxide hydrolase 1,Lysosomal alpha-mannosidase V,Maltase B1,Minichromosome maintenance 3,Minichromosome maintenance 6,mitochondrial translation el…
Under-expressed 48 AEL	1726	Molecular function	transferase activity, transferring hexosyl groups	GO:0016758	4.6e-05	2.27	39	132	20.88	0.295	0.023	Alg10,beta4GalT7,CG10166,CG10178,CG11149,CG11851,CG30438,CG33303,CG33774,CG33977,CG34452,CG4302,CG5724,CG6475,CG8708,Dad1,GalNAc-T1,GalNAc-T2,O-fut1,Ost48,OstDelta,Ostgamma,pgant3,pgant5,pgant6,PIG-B,PIG-C,rt,rumi,Stt3A,Stt3B,tw,Ugt,Ugt35b,Ugt37b1,Ugt37c1,Ugt86Dd,Ugt86De,wol	Alpha 3 glucosyltransferase,beta-4-galactosyltransferase 7,Catalytic subunit 3A of the oligosaccharyltransferase complex,Catalytic subunit 3B of the oligosaccharyltransferase complex,Defender against apoptotic cell death 1,GalNAc-T1,O-fucosyltransferase 1,Oligosaccharide transferase Delta subunit,Oligosaccharide transferase gamma subunit,Oligosaccharyltransferase 48kD subunit,Phosphatidylinositol…
Under-expressed 48 AEL	1726	Molecular function	oxidoreductase activity, acting on the CH-OH group of donors, NAD or NADP as acceptor	GO:0016616	6.4e-05	3.36	20	52	8.22	0.385	0.012	Adh,Adhr,CG10131,CG10638,CG1236,CG12766,CG18814,CG2767,CG6287,CG7322,Fdh,Gmer,Gpdh,Idh,Mfe2,Mtpalpha,Pgd,scu,Sptr,Zw	Adh-related,Alcohol dehydrogenase,Formaldehyde dehydrogenase,GDP-4-keto-6-deoxy-D-mannose 3,5-epimerase/4-reductase,Glycerol 3 phosphate dehydrogenase,Isocitrate dehydrogenase,Mitochondrial trifunctional protein alpha subunit,peroxisomal Multifunctional enzyme type 2,Phosphogluconate dehydrogenase,scully,Sepiapterin reductase,uncharacterized protein,Zwischenferment
Under-expressed 48 AEL	1726	Molecular function	oxidoreductase activity	GO:0016491	8e-05	1.58	106	475	75.13	0.223	0.061	Acox57D-d,Adh,Adhr,AIF,AOX2,Arc42,CG10131,CG10211,CG10638,CG10672,CG11162,CG12262,CG1236,CG12766,CG14997,CG15343,CG15531,CG18547,CG1998,CG2767,CG30427,CG31075,CG31371,CG31559,CG3270,CG4020,CG42331,CG45065,CG4860,CG5065,CG5167,CG5321,CG5948,CG6287,CG7322,CG7460,CG7484,CG7560,CG7840,CG8303,CG8306,CG9503,CG9514,CG9518,CG9522,CG9527,CG9698,CG9747,Coprox,Cyp28d2,Cyp301a1,Cyp304a1,Cyp305a1,Cyp310a1,Cyp…	acyl-Coenzyme A oxidase at 57D distal,Adh-related,Alcohol dehydrogenase,Aldehyde oxidase 2,Apoptosis inducing factor,Arc42,Coproporphyrinogen oxidase,Curly Su,Cyp28d2,Cyp301a1,Cyp304a1,Cyp305a1,Cyp310a1,Cyp318a1,Cyp49a1,Cyp4ad1,Cyp4d14,Cyp6a18,Cyp6a21,Cyp6g1,Cyp6t1,Cyp9f2,Cytochrome P450-4d1,Cytochrome P450-4e1,Cytochrome P450-4e2,Cytochrome P450-6a2,Cytochrome P450-6a8,Dihydropteridine reductase…
Under-expressed 48 AEL	1726	Molecular function	unfolded protein binding	GO:0051082	0.00012	2.64	26	79	12.49	0.329	0.015	Calr,CCT1,CCT2,CCT3,CCT5,CCT7,CCT8,CG11267,CG17266,CG2852,Cnx99A,Cyp1,Gp93,Hsc70-3,Hsp67Ba,Hsp68,Hsp70Ba,l(2)efl,nudC,P58IPK,Pfdn1,Pfdn5,Pfdn6,shv,sip3,Ugt	Calnexin 99A,Calreticulin,Chaperonin containing TCP1 subunit 1,Chaperonin containing TCP1 subunit 2,Chaperonin containing TCP1 subunit 3,Chaperonin containing TCP1 subunit 5,Chaperonin containing TCP1 subunit 7,Chaperonin containing TCP1 subunit 8,Cyclophilin 1,Glycoprotein 93,Heat shock 70-kDa protein cognate 3,Heat shock gene 67Ba,Heat shock protein 68,Heat-shock-protein-70Ba,lethal (2) essenti…
Under-expressed 48 AEL	1726	Molecular function	fatty-acyl-CoA reductase (alcohol-forming) activity	GO:0080019	0.00045	9.36	7	11	1.74	0.636	0.004	CG30427,CG4020,CG5065,CG8303,CG8306,FarO,wat	Fatty acyl-CoA reductase in oenocytes,uncharacterized protein,waterproof
Under-expressed 48 AEL	1726	Molecular function	catalytic activity, acting on a protein	GO:0140096	0.00083	1.31	213	1114	176.2	0.191	0.123	Ance,Ance-2,Art8,aurB,CalpC,Cdk1,Cdk4,CG10602,CG11911,CG11912,CG12256,CG1304,CG13744,CG15253,CG15254,CG15255,CG15485,CG17134,CG17266,CG17337,CG17571,CG17633,CG2915,CG30025,CG30031,CG30371,CG30382,CG31267,CG31269,CG31780,CG31954,CG32376,CG32379,CG33459,CG3355,CG3964,CG4017,CG42264,CG43124,CG43125,CG4678,CG4829,CG5131,CG5188,CG5355,CG6337,CG6347,CG6696,CG7025,CG7631,CG7860,CG7889,CG8170,CG8172,CG82…	Ance-2,Angiotensin converting enzyme,Arginine methyltransferase 8,aurora B,Calpain C,Cyclin E,Cyclin-dependent kinase 1,Cyclin-dependent kinase 4,Cyclophilin 1,Derlin-1,dodo,ERp60,GalNAc-T1,gammaTrypsin,Jonah 25Bi,Jonah 25Bii,Jonah 25Biii,Jonah 44E,lambdaTry,lesswright,lethal (2) k05911,Nardilysin,Notopleural,O-fucosyltransferase 1,Phosphatidylinositol glycan anchor biosynthesis class U,polypepti…
Under-expressed 48 AEL	1726	Cellular component	endoplasmic reticulum	GO:0005783	2.2e-25	3.44	139	382	58.56	0.364	0.081	Alg10,CaBP1,CG10166,CG10470,CG11162,CG11999,CG13284,CG1371,CG15168,CG17593,CG1998,CG2023,CG2046,CG2254,CG2781,CG2852,CG2918,CG30008,CG32069,CG32276,CG32576,CG33129,CG33303,CG33774,CG33977,CG4293,CG4302,CG44252,CG4880,CG4972,CG6230,CG6746,CG7011,CG7149,CG7484,CG7840,CG7872,CG8331,CG9175,CG9662,CG9669,CHOp24,CNPYb,Dad1,Der-1,EMC1,EMC3,ERp60,Fkbp14,GPHR,Grasp65,heix,Hsc70-3,jagn,KdelR,l(1)G0320,l(2)…	Alpha 3 glucosyltransferase,calcium-binding protein 1,Canopy b,CHOp24,Defender against apoptotic cell death 1,Derlin-1,ER Membrane protein Complex 1,ER Membrane protein Complex 3,ERp60,FK506-binding protein 14,Golgi pH Regulator,Grasp65,Heat shock 70-kDa protein cognate 3,heixuedian,jagunal,KDEL receptor,Lamin B receptor,lethal (1) G0320,lethal (2) neighbor of tid,logjam,membrin,Microsomal triacy…
Under-expressed 48 AEL	1726	Cellular component	extracellular matrix	GO:0031012	3.6e-20	4.86	73	160	24.53	0.456	0.042	Ccp84Aa,Ccp84Ab,Ccp84Ac,Ccp84Ad,Ccp84Af,CG17211,CG30203,CG31268,CG34461,CG34462,CG43333,Cpr12A,Cpr23B,Cpr30F,Cpr35B,Cpr47Eb,Cpr47Ec,Cpr47Ed,Cpr49Ac,Cpr49Ad,Cpr49Ag,Cpr49Ah,Cpr51A,Cpr5C,Cpr60D,Cpr64Ab,Cpr64Ad,Cpr65Ea,Cpr65Eb,Cpr65Ec,Cpr66Cb,Cpr66D,Cpr67Fa2,Cpr67Fb,Cpr78Cb,dpy,LanA,LanB1,Lcp2,Lcp4,Lcp65Ab1,Lcp65Ad,Lcp65Af,Lcp65Ag1,mfas,Muc68Ca,Muc91C,Mur89F,Ndg,nompA,Pcp,Ppn,Pxn,sas,serp,Tb,Tig,tnc…	Ccp84Aa,Ccp84Ab,Ccp84Ac,Ccp84Ad,Ccp84Af,Cuticular protein 12A,Cuticular protein 23B,Cuticular protein 30F,Cuticular protein 35B,Cuticular protein 47Eb,Cuticular protein 47Ec,Cuticular protein 47Ed,Cuticular protein 49Ac,Cuticular protein 49Ad,Cuticular protein 49Ag,Cuticular protein 49Ah,Cuticular protein 51A,Cuticular protein 5C,Cuticular protein 60D,Cuticular protein 64Ab,Cuticular protein 64Ad…
Under-expressed 48 AEL	1726	Cellular component	extracellular region	GO:0005576	7.2e-18	2.2	208	783	120.03	0.266	0.121	Ance,Ance-2,Ance-5,CG12256,CG13748,CG13806,CG15225,CG17211,CG17337,CG17633,CG17974,CG2852,CG2915,CG2918,CG30197,CG30203,CG31268,CG31997,CG32284,CG32379,CG33459,CG3355,CG4017,CG42264,CG42326,CG43333,CG43366,CG4386,CG4678,CG4847,CG5177,CG5397,CG6337,CG6347,CG6426,CG7025,CG8160,CG8213,CG8460,CG8586,CG8738,CG8945,CG9400,CG9672,Cht10,Cht9,ck,Cpr12A,Cpr23B,Cpr30F,Cpr35B,Cpr47Eb,Cpr47Ec,Cpr47Ed,Cpr49Ac,…	Ance-2,Ance-5,Angiotensin converting enzyme,Chitinase 10,Chitinase 9,crinkled,Cuticular protein 12A,Cuticular protein 23B,Cuticular protein 30F,Cuticular protein 35B,Cuticular protein 47Eb,Cuticular protein 47Ec,Cuticular protein 47Ed,Cuticular protein 49Ac,Cuticular protein 49Ad,Cuticular protein 49Ag,Cuticular protein 49Ah,Cuticular protein 51A,Cuticular protein 5C,Cuticular protein 60D,dumpy,F…
Under-expressed 48 AEL	1726	Cellular component	peptidase complex	GO:1905368	8.4e-13	6.2	36	69	10.55	0.522	0.021	CG30382,not,Pomp,Prosalpha2,Prosalpha3,Prosalpha4,Prosalpha5,Prosalpha6,Prosalpha7,Prosbeta1,Prosbeta2,Prosbeta3,Prosbeta4,Prosbeta5,Prosbeta6,Prosbeta7,Rpn1,Rpn10,Rpn11,Rpn12,Rpn2,Rpn3,Rpn5,Rpn7,Rpn8,Rpn9,Rpt1,Rpt2,Rpt3,Rpt3R,Rpt4,Rpt5,Rpt6,Sem1,Spase12,Spase22-23,Spase25,TER94,twr,Uch-L5	non-stop,pomp,Proteasome alpha2 subunit,Proteasome alpha3 subunit,Proteasome alpha4 subunit,Proteasome alpha5 subunit,Proteasome alpha6 subunit,Proteasome alpha7 subunit,Proteasome beta1 subunit,Proteasome beta2 subunit,Proteasome beta3 subunit,Proteasome beta4 subunit,Proteasome beta5 subunit,Proteasome beta6 subunit,Proteasome beta7 subunit,Regulatory particle non-ATPase 1,Regulatory particle n…
Under-expressed 48 AEL	1726	Cellular component	proteasome accessory complex	GO:0022624	2.1e-11	17.75	19	25	3.83	0.76	0.011	Rpn1,Rpn10,Rpn11,Rpn12,Rpn2,Rpn3,Rpn5,Rpn7,Rpn8,Rpn9,Rpt1,Rpt2,Rpt3,Rpt3R,Rpt4,Rpt5,Rpt6,Sem1,Uch-L5	Regulatory particle non-ATPase 1,Regulatory particle non-ATPase 10,Regulatory particle non-ATPase 11,Regulatory particle non-ATPase 12,Regulatory particle non-ATPase 2,Regulatory particle non-ATPase 3,Regulatory particle non-ATPase 5,Regulatory particle non-ATPase 7,Regulatory particle non-ATPase 8,Regulatory particle non-ATPase 9,Regulatory particle triple-A ATPase 1,Regulatory particle triple-A…
Under-expressed 48 AEL	1726	Cellular component	organelle subcompartment	GO:0031984	1.1e-09	2.3	88	308	47.22	0.286	0.051	Alg10,alt,Arf79F,ArfGAP1,Arl1,beta'COP,CG10166,CG10470,CG11162,CG11999,CG1371,CG14511,CG15168,CG15531,CG16904,CG1998,CG2781,CG30008,CG32069,CG33052,CG33303,CG33774,CG33977,CG3678,CG4293,CG4972,CG5484,CG5510,CG6230,CG6660,CG7011,CG7149,CG7872,CG8708,CG9175,CG9662,CG9669,CG9747,Csat,Dad1,Der-1,EMC1,EMC3,ergic53,GalNAc-T1,GalNAc-T2,gammaCOP,Glg1,GPHR,Grasp65,Gtp-bp,heix,jagn,l(1)G0320,l(2)not,LBR,me…	ADP ribosylation factor at 79F,ADP ribosylation factor-like 1,ADP-ribosylation factor GTPase activating protein 1,Alpha 3 glucosyltransferase,aluminum tubes,Catalytic subunit 3B of the oligosaccharyltransferase complex,Coat Protein (coatomer) beta',Coat Protein (coatomer) gamma,csat,Defender against apoptotic cell death 1,Derlin-1,ER Membrane protein Complex 1,ER Membrane protein Complex 3,ergic5…
Under-expressed 48 AEL	1726	Cellular component	COPII-coated ER to Golgi transport vesicle	GO:0030134	2.3e-09	11.2	18	27	4.14	0.667	0.01	bai,CG32069,CG4293,CG5484,CG5510,CG7011,CHOp24,eca,ergic53,loj,Membrin,p115,p24-1,p24-2,Sec13,Sec22,Sec23,Sec24CD	baiser,CHOp24,eclair,ergic53,logjam,membrin,p115,p24-related-1,p24-related-2,Secretory 13,Secretory 22,Secretory 23,Secretory 24CD,uncharacterized protein
Under-expressed 48 AEL	1726	Cellular component	proteasome complex	GO:0000502	5.9e-09	12.97	16	23	3.48	0.696	0.009	CG30382,Pomp,Prosalpha2,Prosalpha3,Prosalpha4,Prosalpha5,Prosalpha6,Prosalpha7,Prosbeta1,Prosbeta2,Prosbeta3,Prosbeta4,Prosbeta5,Prosbeta6,Prosbeta7,Rpn1,Rpn10,Rpn11,Rpn12,Rpn2,Rpn3,Rpn5,Rpn7,Rpn8,Rpn9,Rpt1,Rpt2,Rpt3,Rpt3R,Rpt4,Rpt5,Rpt6,Sem1,TER94,Uch-L5	pomp,Proteasome alpha2 subunit,Proteasome alpha3 subunit,Proteasome alpha4 subunit,Proteasome alpha5 subunit,Proteasome alpha6 subunit,Proteasome alpha7 subunit,Proteasome beta1 subunit,Proteasome beta2 subunit,Proteasome beta3 subunit,Proteasome beta4 subunit,Proteasome beta5 subunit,Proteasome beta6 subunit,Proteasome beta7 subunit,Regulatory particle non-ATPase 1,Regulatory particle non-ATPase…
Under-expressed 48 AEL	1726	Cellular component	extracellular space	GO:0005615	1e-08	2.01	107	415	63.62	0.258	0.062	26-29-p,Adgf-C,Alp4,Ance,Ance-2,Ance-5,apolpp,betaGlu,Calr,Ccp84Ad,CG10264,CG11836,CG11854,CG12256,CG13748,CG14820,CG15225,CG15497,CG17271,CG17633,CG17919,CG17974,CG2016,CG2852,CG2915,CG2918,CG31266,CG31268,CG31997,CG32379,CG33459,CG3355,CG34034,CG3868,CG4017,CG42264,CG42326,CG43333,CG43366,CG4386,CG4408,CG4613,CG4678,CG4847,CG4914,CG5397,CG5948,CG6337,CG6347,CG6426,CG7025,CG8420,CG8460,CG8483,CG…	26-29kD-proteinase,Adenosine deaminase-related growth factor C,Alkaline phosphatase 4,Ance-2,Ance-5,Angiotensin converting enzyme,apolipophorin,beta glucuronidase,Calreticulin,Ccp84Ad,Chitinase 5,Chitinase 9,Cuticular protein 51A,Cuticular protein 67Fb,easter,Esterase 6,FK506-binding protein 14,four-jointed,Glial Lazarillo,Glycoprotein 93,Heat shock 70-kDa protein cognate 3,Insulin-like peptide 2…
Under-expressed 48 AEL	1726	Cellular component	oligosaccharyltransferase complex	GO:0008250	4.6e-08	Inf	9	9	1.38	1	0.005	CG33303,CG33774,CG9662,CG9669,Dad1,Ost48,OstDelta,Ostgamma,Stt3B	Catalytic subunit 3B of the oligosaccharyltransferase complex,Defender against apoptotic cell death 1,Oligosaccharide transferase Delta subunit,Oligosaccharide transferase gamma subunit,Oligosaccharyltransferase 48kD subunit,uncharacterized protein
Under-expressed 48 AEL	1726	Cellular component	endoplasmic reticulum membrane	GO:0005789	8.5e-08	2.69	50	157	23.77	0.318	0.029	Alg10,alt,CG10166,CG10470,CG11162,CG11999,CG1371,CG14511,CG15168,CG15531,CG16904,CG1998,CG2781,CG30008,CG32069,CG33303,CG33774,CG33977,CG3678,CG4293,CG4972,CG5484,CG5510,CG6230,CG6660,CG7011,CG7149,CG7872,CG9175,CG9662,CG9669,CG9747,Dad1,Der-1,EMC1,EMC3,ergic53,Gtp-bp,jagn,l(1)G0320,l(2)not,LBR,meigo,Membrin,Ost48,OstDelta,Ostgamma,Papst2,PIG-B,PIG-C,PIG-G,PIG-U,Sec22,Sec61alpha,Sec61beta,Sec63,s…	Alpha 3 glucosyltransferase,aluminum tubes,Catalytic subunit 3B of the oligosaccharyltransferase complex,Defender against apoptotic cell death 1,Derlin-1,ER Membrane protein Complex 1,ER Membrane protein Complex 3,ergic53,GTP-binding protein,jagunal,Lamin B receptor,lethal (1) G0320,lethal (2) neighbor of tid,medial glomeruli,membrin,Oligosaccharide transferase Delta subunit,Oligosaccharide trans…
Under-expressed 48 AEL	1726	Cellular component	endoplasmic reticulum-Golgi intermediate compartment	GO:0005793	4.7e-07	13.38	12	17	2.61	0.706	0.007	alphaCOP,bai,CG5484,CG5510,CHOp24,eca,ergic53,gammaCOP,loj,p24-1,p24-2,Sec22	baiser,CHOp24,Coat Protein (coatomer) alpha,Coat Protein (coatomer) gamma,eclair,ergic53,logjam,p24-related-1,p24-related-2,Secretory 22,uncharacterized protein
Under-expressed 48 AEL	1726	Cellular component	proteasome regulatory particle, base subcomplex	GO:0008540	1.3e-06	18.55	10	13	1.99	0.769	0.006	Rpn1,Rpn10,Rpn2,Rpt1,Rpt2,Rpt3,Rpt3R,Rpt4,Rpt5,Rpt6	Regulatory particle non-ATPase 1,Regulatory particle non-ATPase 10,Regulatory particle non-ATPase 2,Regulatory particle triple-A ATPase 1,Regulatory particle triple-A ATPase 2,Regulatory particle triple-A ATPase 3,Regulatory particle triple-A ATPase 3-related,Regulatory particle triple-A ATPase 4,Regulatory particle triple-A ATPase 5,Regulatory particle triple-A ATPase 6
Under-expressed 48 AEL	1726	Cellular component	MCM complex	GO:0042555	2e-06	Inf	7	7	1.07	1	0.004	CG3430,dpa,Mcm2,Mcm3,Mcm5,Mcm6,Mcm7	disc proliferation abnormal,Minichromosome maintenance 2,Minichromosome maintenance 3,Minichromosome maintenance 5,Minichromosome maintenance 6,Minichromosome maintenance 7,uncharacterized protein
Under-expressed 48 AEL	1726	Cellular component	integral component of endoplasmic reticulum membrane	GO:0030176	2.4e-06	3.56	26	67	10.27	0.388	0.015	alt,CG10470,CG14511,CG15168,CG16904,CG2781,CG30008,CG3678,CG4293,CG6660,CG7011,CG9175,Dad1,EMC1,EMC3,l(2)not,LBR,meigo,Papst2,PIG-G,PIG-U,Sec63,Spase12,Spp,ste24a,Trp1	aluminum tubes,Defender against apoptotic cell death 1,ER Membrane protein Complex 1,ER Membrane protein Complex 3,Lamin B receptor,lethal (2) neighbor of tid,medial glomeruli,PAPS transporter 2,Phosphatidylinositol glycan anchor biosynthesis class G,Phosphatidylinositol glycan anchor biosynthesis class U,prenyl protease type I,Secretory 63,Signal peptide peptidase,Spase 12-subunit,Translocation …
Under-expressed 48 AEL	1726	Cellular component	proteasome regulatory particle, lid subcomplex	GO:0008541	1e-05	22.23	8	10	1.53	0.8	0.005	Rpn11,Rpn12,Rpn3,Rpn5,Rpn7,Rpn8,Rpn9,Sem1	Regulatory particle non-ATPase 11,Regulatory particle non-ATPase 12,Regulatory particle non-ATPase 3,Regulatory particle non-ATPase 5,Regulatory particle non-ATPase 7,Regulatory particle non-ATPase 8,Regulatory particle non-ATPase 9,Suppressor of exocyst mutations 1
Under-expressed 48 AEL	1726	Cellular component	proteasome core complex, beta-subunit complex	GO:0019774	1.3e-05	Inf	6	6	0.92	1	0.003	Prosbeta1,Prosbeta2,Prosbeta3,Prosbeta5,Prosbeta6,Prosbeta7	Proteasome beta1 subunit,Proteasome beta2 subunit,Proteasome beta3 subunit,Proteasome beta5 subunit,Proteasome beta6 subunit,Proteasome beta7 subunit
Under-expressed 48 AEL	1726	Cellular component	signal recognition particle, endoplasmic reticulum targeting	GO:0005786	1.4e-05	38.88	7	8	1.23	0.875	0.004	Srp14,Srp19,Srp54k,Srp68,Srp72,Srp9,SsRbeta	Signal recognition particle protein 14,Signal recognition particle protein 19,Signal recognition particle protein 54k,Signal recognition particle protein 68,Signal recognition particle protein 72,Signal recognition particle protein 9,Signal sequence receptor beta
Under-expressed 48 AEL	1726	Cellular component	proteasome core complex, alpha-subunit complex	GO:0019773	1.4e-05	38.88	7	8	1.23	0.875	0.004	CG30382,Prosalpha2,Prosalpha3,Prosalpha4,Prosalpha5,Prosalpha6,Prosalpha7	Proteasome alpha2 subunit,Proteasome alpha3 subunit,Proteasome alpha4 subunit,Proteasome alpha5 subunit,Proteasome alpha6 subunit,Proteasome alpha7 subunit,uncharacterized protein
Under-expressed 48 AEL	1726	Cellular component	U6 snRNP	GO:0005688	7.8e-05	33.3	6	7	1.07	0.857	0.003	CG10418,CG2021,CG6610,CG9344,LSm3,LSm7	Like Sm 3,Like Sm 7,uncharacterized protein
Under-expressed 48 AEL	1726	Cellular component	cytosolic proteasome complex	GO:0031597	7.8e-05	33.3	6	7	1.07	0.857	0.003	Rpn1,Rpn2,Rpt3,Rpt3R,Rpt4,Rpt6	Regulatory particle non-ATPase 1,Regulatory particle non-ATPase 2,Regulatory particle triple-A ATPase 3,Regulatory particle triple-A ATPase 3-related,Regulatory particle triple-A ATPase 4,Regulatory particle triple-A ATPase 6
Under-expressed 48 AEL	1726	Cellular component	nuclear nucleosome	GO:0000788	8.4e-05	Inf	5	5	0.77	1	0.003	cid,His2A:CG33808,His2B:CG33872,His2B:CG33874,His2B:CG33876	centromere identifier,histone H2A,histone H2B
Under-expressed 48 AEL	1726	Cellular component	Golgi-associated vesicle membrane	GO:0030660	9.5e-05	4.83	13	28	4.29	0.464	0.008	alphaCOP,beta'COP,betaCOP,Clc,deltaCOP,epsilonCOP,gammaCOP,Membrin,p115,Sec13,Sec22,Sec23,Sec24CD	Clathrin light chain,Coat Protein (coatomer) alpha,Coat Protein (coatomer) beta,Coat Protein (coatomer) beta',Coat Protein (coatomer) delta,Coat Protein (coatomer) epsilon,Coat Protein (coatomer) gamma,membrin,p115,Secretory 13,Secretory 22,Secretory 23,Secretory 24CD
Under-expressed 48 AEL	1726	Cellular component	protein-DNA complex	GO:0032993	0.00013	3.98	15	36	5.52	0.417	0.009	CDC45L,cid,D1,DNApol-alpha180,DNApol-alpha50,DNApol-alpha60,DNApol-alpha73,His2A:CG33808,His2Av,His2B:CG33872,His2B:CG33874,His2B:CG33876,Orc3,Psf1,RPA2	CDC45L,centromere identifier,D1 chromosomal protein,DNA polymerase alpha 180kD,DNA polymerase alpha 50kD,DNA polymerase alpha 60kD,DNA polymerase alpha 73kD,histone H2A,Histone H2A variant,histone H2B,Origin recognition complex subunit 3,Psf1,Replication protein A2
Under-expressed 48 AEL	1726	Cellular component	chaperonin-containing T-complex	GO:0005832	0.00027	16.65	6	8	1.23	0.75	0.003	CCT1,CCT2,CCT3,CCT5,CCT7,CCT8	Chaperonin containing TCP1 subunit 1,Chaperonin containing TCP1 subunit 2,Chaperonin containing TCP1 subunit 3,Chaperonin containing TCP1 subunit 5,Chaperonin containing TCP1 subunit 7,Chaperonin containing TCP1 subunit 8
Under-expressed 48 AEL	1726	Cellular component	nuclear origin of replication recognition complex	GO:0005664	0.00044	27.73	5	6	0.92	0.833	0.003	Orc1,Orc2,Orc3,Orc5,Orc6	Origin recognition complex subunit 1,Origin recognition complex subunit 2,Origin recognition complex subunit 3,Origin recognition complex subunit 5,Origin recognition complex subunit 6
Under-expressed 48 AEL	1726	Cellular component	rough endoplasmic reticulum membrane	GO:0030867	0.00044	27.73	5	6	0.92	0.833	0.003	Der-1,Gtp-bp,Sec61alpha,Sec61beta,Sec63	Derlin-1,GTP-binding protein,Sec61 alpha subunit,Sec61 beta subunit,Secretory 63
Under-expressed 48 AEL	1726	Cellular component	nuclear replication fork	GO:0043596	0.00048	5.05	10	21	3.22	0.476	0.006	CDC45L,CG10336,Ctf4,DNApol-alpha180,DNApol-alpha50,DNApol-alpha60,DNApol-alpha73,Mcm10,RPA2,timeout	CDC45L,Chromosome transmission fidelity 4,DNA polymerase alpha 180kD,DNA polymerase alpha 50kD,DNA polymerase alpha 60kD,DNA polymerase alpha 73kD,Minichromosome maintenance 10,Replication protein A2,timeout,uncharacterized protein
Under-expressed 48 AEL	1726	Cellular component	alpha DNA polymerase:primase complex	GO:0005658	0.00055	Inf	4	4	0.61	1	0.002	DNApol-alpha180,DNApol-alpha50,DNApol-alpha60,DNApol-alpha73	DNA polymerase alpha 180kD,DNA polymerase alpha 50kD,DNA polymerase alpha 60kD,DNA polymerase alpha 73kD
Under-expressed 48 AEL	1726	Cellular component	signal peptidase complex	GO:0005787	0.00055	Inf	4	4	0.61	1	0.002	Spase12,Spase22-23,Spase25,twr	Spase 12-subunit,Spase 22/23-subunit,Spase 25-subunit,twisted bristles roughened eye
Under-expressed 48 AEL	1726	Cellular component	small nuclear ribonucleoprotein complex	GO:0030532	0.0007	2.72	19	58	8.89	0.328	0.011	CG10418,CG2021,CG3542,CG4849,CG6610,CG9344,hoip,LSm3,LSm7,Phf5a,Prp8,Sf3b6,SmB,SmD1,SmD2,SmE,SmF,SNRPG,U2A	hoi-polloi,Like Sm 3,Like Sm 7,PHD finger protein 5a,pre-mRNA processing factor 8,Small nuclear ribonucleoprotein G,Small ribonucleoprotein particle protein SmB,Small ribonucleoprotein particle protein SmD1,Small ribonucleoprotein particle protein SmD2,Small ribonucleoprotein particle protein SmE,Small ribonucleoprotein particle protein SmF,Splicing factor 3b subunit 6,U2A,uncharacterized protein
Under-expressed 48 AEL	1726	Cellular component	COPI vesicle coat	GO:0030126	0.00071	11.1	6	9	1.38	0.667	0.003	alphaCOP,beta'COP,betaCOP,deltaCOP,epsilonCOP,gammaCOP	Coat Protein (coatomer) alpha,Coat Protein (coatomer) beta,Coat Protein (coatomer) beta',Coat Protein (coatomer) delta,Coat Protein (coatomer) epsilon,Coat Protein (coatomer) gamma
Under-expressed 48 AEL	1726	Cellular component	COPI-coated vesicle	GO:0030137	0.00071	11.1	6	9	1.38	0.667	0.003	alphaCOP,beta'COP,betaCOP,deltaCOP,epsilonCOP,gammaCOP	Coat Protein (coatomer) alpha,Coat Protein (coatomer) beta,Coat Protein (coatomer) beta',Coat Protein (coatomer) delta,Coat Protein (coatomer) epsilon,Coat Protein (coatomer) gamma
Under-expressed 48 AEL	1726	Cellular component	nuclear pore outer ring	GO:0031080	0.00071	11.1	6	9	1.38	0.667	0.003	Nup107,Nup133,Nup37,Nup43,Nup75,Sec13	Nucleoporin 107kD,Nucleoporin 133kD,Nucleoporin 37kD,Nucleoporin 43kD,Nucleoporin 75kD,Secretory 13
Under-expressed 48 AEL	1726	Cellular component	U4/U6 x U5 tri-snRNP complex	GO:0046540	0.00098	5	9	19	2.91	0.474	0.005	CG10418,CG2021,CG6610,CG9344,hoip,LSm3,SmB,SmD2,SmE	hoi-polloi,Like Sm 3,Small ribonucleoprotein particle protein SmB,Small ribonucleoprotein particle protein SmD2,Small ribonucleoprotein particle protein SmE,uncharacterized protein
